1 **Population-level genome-wide STR typing in *Plasmodium* species reveals higher resolution**  
2 **population structure and genetic diversity relative to SNP typing**

3 Jiru Han<sup>1,2</sup>, Jacob E. Munro<sup>1</sup>, Anthony Kocoski<sup>1,3</sup>, Alyssa E. Barry<sup>1,2,4,5</sup>, Melanie Bahlo<sup>1,2\*</sup>

4 **1** Population Health and Immunity Division, The Walter and Eliza Hall Institute of Medical Research, Melbourne,  
5 VIC, Australia, **2** Department of Medical Biology, The University of Melbourne, VIC, Australia, **3** Department of  
6 Mathematics and Statistics, The University of Melbourne, VIC, Australia, **4** Disease Elimination Program, Burnet  
7 Institute, Melbourne, VIC, Australia, **5** Present Address: IMPACT Institute for Innovation in Mental and Physical  
8 Health and Clinical Translation, Deakin University, 75 Pigdons Road, Waurn Ponds, Geelong, VIC 3216, Australia.

9 \* [bahlo@wehi.edu.au](mailto:bahlo@wehi.edu.au)

10 **Abstract**

11 Short tandem repeats (STRs) are highly informative genetic markers that have been used  
12 extensively in population genetics analysis. They are an important source of genetic diversity and  
13 can also have functional impact. Despite the availability of bioinformatic methods that permit  
14 large-scale genome-wide genotyping of STRs from whole genome sequencing data, they have not  
15 previously been applied to sequencing data from large collections of malaria parasite field samples.  
16 Here, we have genotyped STRs using HipSTR in more than 3,000 *Plasmodium falciparum* and  
17 174 *Plasmodium vivax* published whole-genome sequence data from samples collected across the  
18 globe. High levels of noise and variability in the resultant callset necessitated the development of  
19 a novel method for quality control of STR genotype calls. A set of high-quality STR loci (6,768  
20 from *P. falciparum* and 3,496 from *P. vivax*) were used to study *Plasmodium* genetic diversity,  
21 population structures and genomic signatures of selection and these were compared to genome-

22 wide single nucleotide polymorphism (SNP) genotyping data. In addition, the genome-wide  
23 information about genetic variation and other characteristics of STRs in *P. falciparum* and *P. vivax*  
24 have been made available in an interactive web-based R Shiny application PlasmoSTR  
25 (<https://github.com/bahlolab/PlasmoSTR>).

## 26 **Author summary**

27 Malaria is a severe disease caused by a genus of parasites called *Plasmodium* and is transmitted to  
28 humans through infected *Anopheles* mosquitoes. *P. falciparum* and *P. vivax* are the predominant  
29 species responsible for more than 95% of all human malaria infections which continue to pose a  
30 significant challenge to human health. Antimalarial drug resistance is a serious threat hindering  
31 the elimination of malaria. As such, it is important to understand the role of genomic variation in  
32 the development of antimalarial drug resistance. STRs are an important source of genomic  
33 variation that, from a population genetics perspective, have several advantages over SNPs,  
34 including being highly polymorphic, having a higher mutation rate, and having been widely used  
35 to study the population structure and genetic diversity. However, STRs are not routinely genotyped  
36 with bioinformatic tools across the whole genome with short read sequencing data because they  
37 are difficult to identify and genotype accurately, as they vary in size and may align poorly to the  
38 reference genome, therefore requiring rigorous quality control (QC). In this study, we genotype  
39 STRs using HipSTR[1] in more than 3,000 *P. falciparum* and 174 *P. vivax* whole-genome  
40 sequence samples collected world-wide. We develop a multivariable logistic regression model for  
41 the measurement and prediction of the quality of STRs. In addition, we use a set of genome-wide  
42 high-quality STRs to study parasite population genetics and compare them to genome-wide SNP

43 genotyping data, revealing both high consistency with SNP based signals, as well as identifying  
44 some signals unique to the STR marker data. These results demonstrate that the identification of  
45 highly informative STR markers from large numbers of population samples is a powerful approach  
46 to study the genetic diversity, population structures and genomic signatures of selection in *P.*  
47 *falciparum* and *P. vivax*. Furthermore, we built an interactive web-based R Shiny application  
48 PlasmoSTR (<https://github.com/bahlolab/PlasmoSTR>) that includes genome-wide information  
49 about genetic variation and other characteristics of the high quality STRs identified in *P.*  
50 *falciparum* and *P. vivax*, allowing researchers to explore and visualize the specific STRs.

## 51 **Introduction**

52 Short tandem repeats (STRs), also known as microsatellites, are tandem nucleotide repeats (1-9  
53 base pairs) that are both abundant throughout the genome and highly polymorphic. Unlike many  
54 other types of genetic markers, STRs have a high mutation rate that is highly variable across  
55 different loci. *P. falciparum* has the most AT-rich eukaryotic genome known, with 80.6% A + T  
56 content overall and approaching 90% in introns and intergenic regions[2]. As a consequence, many  
57 regions in *P. falciparum* genome are highly repetitive, and STRs are found in abundance in both  
58 coding and noncoding regions throughout the *P. falciparum* parasite genome[2, 3] leading to about  
59 10.74% of the *P. falciparum* genome being composed of STRs[2, 4]. In contrast, the total A+T  
60 content in *P. vivax* is 57.7%[5, 6]. In organisms with AT content close to 50%, such as *Drosophila*  
61 or humans, STRs only account for 1–3% of the genome[4, 7, 8]. These repetitive sequences can  
62 arise, expand or contract rapidly. In many cases, the simple homopolymer repeats tend to evolve  
63 neutrally and may not have a function, representing non-functional ‘junk DNA’, however more

64 complex sequences seem to be under selective pressure indicating a functional role[3, 9, 10]. The  
65 repetitive protein sequences of *Plasmodium* have been previously shown to alter protein activity,  
66 protein folding efficiency, stability, or aggregation and play an important role in the formation of  
67 key structural elements of protein function[10]. STRs in coding regions with a motif size that is a  
68 multiple of three (e.g. trinucleotide or hexanucleotide repeats) will not result in a frame-shift  
69 mutation when repeats are deleted or added, but can change protein sequences[11]. For example,  
70 the *Pfnhe-1* protein contains a polymorphic amino acid motif DNNND (GATAACAATAATGAT)  
71 and DDNHNDNHND (GATGATAACCATAATGATAATCATAATAATGAT) which affects  
72 the *P. falciparum* Na<sup>+</sup>/H<sup>+</sup> exchanger capabilities, and influences quinine resistance by combining  
73 *Pfcrt* and *Pfmdr1*[12, 13].

74 STRs have also been widely used to study the population structure and genetic diversity of *P.*  
75 *falciparum* and *P. vivax* populations in many countries[14-17]. However, most studies used  
76 relatively few (< 20) polymorphic STR markers. These STRs were typed using a variety of low-  
77 throughput lab-based methods, most recently with capillary electrophoresis[18, 19]. Extending  
78 these low-throughput methods to hundreds of STR markers or genome-wide is prohibitive in both  
79 time and cost. A few previous studies of genome-wide STRs analyses used *Plasmodium* reference  
80 genome or limited *in vitro Plasmodium* samples and mainly focused on examining compositions  
81 and function of STRs[10, 11, 20] and mutation rates[4, 21]. The overall contributory effect of STR  
82 variation in *Plasmodium* field samples has not been evaluated at a genome-wide level.

83 Recently developed bioinformatic methods that infer the length of STR alleles using short-read  
84 sequencing data permit STR genotyping from large collections of samples. There are many tools  
85 for genotyping STRs, such as GATK HaplotypeCaller[22], LobSTR[23], RepeatSeq[24],

86 HipSTR[1] and GangSTR[25]. We used HipSTR[1], which is a haplotype-based method  
87 specifically designed for STR analysis. While other STR tools were mainly developed for calling  
88 the STR length per individual sample, HipSTR considers the entire sequence across all samples in  
89 the dataset for each STR site, and has been shown to outperform other tools when considering  
90 genotyping error rate, even with low coverage[26].

91 Here, we report the first large-scale STR typing study in more than 3,000 *P. falciparum*[27] and  
92 174 *P. vivax*[28, 29] short-read whole genome sequencing samples sourced from global malaria  
93 hot-spots. A central aim of this work was to develop a filtering strategy to discover a set of high-  
94 quality STR variants and build a publically available and easy to use resource available for  
95 researchers who are interested in looking at the role of specific STRs throughout the *Plasmodium*  
96 genome. We then aimed to compare the performance of genome-wide SNPs data and STRs data  
97 in the following aspects: delineate population structure, genetic diversity, and genetic  
98 differentiation metrics. We also explored the biological importance of STR variation in different  
99 populations, and identified STR loci that may be linked to antimalarial drug resistance.

## 100 **Results**

### 101 **SNP genotyping**

#### 102 **MalariaGEN global *P. falciparum* dataset.**

103 Variations at more than three million positions were discovered in the *P. falciparum* dataset in the  
104 first stage of variant analysis. These included 1,542,905 SNPs and 1,545,263 indels. After  
105 performing all the filtering procedures (see Methods for more details), a total of 213,757 biallelic

106 SNPs were retained. We removed 194 samples with higher than 10% missing genotypes or other  
107 quality control issues leaving a total of 3,047 high-quality samples from the 26 countries (remove  
108 Burkina Faso) of 8 populations. Sample size varied by population with South America (SAM) =  
109 31, West Africa (WAF) = 959, Central Africa (CAF) = 100, East Africa (EAF) = 327, South Asia  
110 (SAS) = 32, the western part of Southeast Asia (WSEA) = 690, the eastern part of Southeast Asia  
111 (ESEA) = 827 and Oceania (OCE) = 81[27]. The downstream analysis of the *P. falciparum* dataset  
112 in this paper is based on the filtered dataset of high-quality SNP genotypes in 3,047 samples.

### 113 **Global *P. vivax* dataset.**

114 Variations included 1,345,364 SNPs and 715,369 indels discovered in the *P. vivax* dataset in the  
115 first stage of variant analysis. After performing all the filtering procedures, a total of 188,571  
116 biallelic SNPs were retained. We removed samples with multiple infections as determined by the  
117 within-host infection fixation index ( $F_{ws}$ ) metric[30, 31], or higher than 10% missing genotypes or  
118 other quality control issues, leaving 174 high-quality samples from 11 countries. Sample size  
119 varied by country with Brazil = 2, Cambodia = 16, Colombia = 27, Indonesia = 2, Malaysia = 3,  
120 Mexico = 17, Myanmar = 7, Peru = 30, Papua New Guinea (PNG) = 7, Thailand = 59, Vietnam =  
121 4 samples respectively. The downstream analysis of the *P. vivax* dataset in this paper is based on  
122 the filtered dataset of high-quality SNP genotypes in 174 samples.

### 123 **STR genotyping**

124 We identified 104,649 high quality STRs from the *P. falciparum* 3D7 reference genome  
125 (accounting for 9.29% of the genome) and 40,224 STRs from the *P. vivax* PvP01 reference genome  
126 (accounting for 3.16% of the genome) by using Tandem Repeats Finder (TRF)[32]. The number

127 of STRs in *P. falciparum* is almost three times that of *P. vivax*. STRs with a 1-6 bp repeat unit  
128 account for 97.32% of *P. falciparum* 3D7 reference genome and 95.27% of *P. vivax* PvP01  
129 reference genome STRs. Of these, homopolymeric tracts account for 40.09% of the *P. falciparum*,  
130 64.16% of the *P. vivax*. The dinucleotide repeats account for 24.66% of the *P. falciparum*, while  
131 only 6.38% of the *P. vivax*. The higher proportion of dinucleotide repeats in *P. falciparum* can be  
132 attributed to the overall high AT content of the *P. falciparum* genome, with 24% of dinucleotide  
133 repeats in *P. falciparum* having the ‘AT’ motif, and 3% of dinucleotide repeats in *P. vivax* having  
134 the ‘AT’ motif.

135 A total of 20,196 STRs remained for downstream analysis across 3,047 *P. falciparum* samples  
136 after the initial QC filtering steps (see Methods for more details). The majority of STRs were  
137 located in promoter region (53.02%), coding region (25%), followed by the intergenic region  
138 (12.91%), intron region (8.61%) and other regions. *P. falciparum* is an extremely AT-rich genome  
139 but with higher GC content in coding and promoter regions, probably leading to more confident  
140 calling and higher quality STRs in those regions. STRs with a 1–6 bp repeat unit accounted for  
141 96.24% of all the STRs. Of these, 9,382 (46.45%) are homopolymeric tracts (mononucleotide  
142 STRs), 3,563 (17.64%) are dinucleotide repeats, and 3,767 (18.65%) are trinucleotide repeats.  
143 Almost all the STR motifs (99.99%) have a repeat unit containing ‘A’ or ‘T’.

144 A total of 23,146 STRs were retained for downstream analysis across 174 *P. vivax* samples after  
145 performing all the filtering procedures. The number of STRs varies in different genomic regions:  
146 promoter region (48.88%), coding region (27.35%), intergenic region (16.12%), followed by the  
147 intron region (7.47%) and other regions. STRs with a 1–6 bp repeat unit accounted for 94.59% of

148 all the STRs. Of these, 14,386 (62.15%) are homopolymeric tracts, 1,324 (5.72%) are dinucleotide  
149 repeats, and 4,251 (18.37%) are trinucleotide repeats.

150 To measure HipSTR's quality of prediction, we inspected HipSTR's genotype calls for the markers  
151 against the gel electrophoresis (GE) calls (see Methods for more details) and found HipSTR is  
152 calling length polymorphisms accurately with respect to the GE calls (S1 Fig).

### 153 **Multivariable logistic regression modeling for measurement and prediction of the quality of** 154 **STRs**

155 A set of metrics including QC metrics from HipSTR and other metrics that were deemed useful  
156 were derived and used for the prediction of the STR quality. These are summarised in S1 Table.

157 A multivariable logistic regression analysis was then performed to identify potential predictors of  
158 STR quality (see Methods for more details). Because STRs with mononucleotide repeats are more  
159 abundant and have higher error rates, we built separate regression models for the mononucleotide  
160 (1 bp motif) STRs and the polynucleotide (2-9 bp motif) STRs. Examination of Spearman's  
161 correlation coefficients ( $R^2$ ) suggested that selecting the first five SNP principal components (PCs)  
162 were sufficient to capture the signal STRs. For the *P. falciparum* dataset, features that were  
163 significantly associated with the STR quality and the results obtained for the estimated coefficients  
164 for both the mononucleotide STR and polynucleotide STR models are presented in Table 1. For  
165 both the mononucleotide STR and polynucleotide STR models, the STR quality tends to be more  
166 associated with the STR features that captured population specific aspects of the dataset.  
167 Compared to the polynucleotide STR model, 'Mean\_Posterior' which is the mean posterior  
168 probability of the STR genotype across all samples derived from HipSTR, exhibited a large effect,  
169 but only in the mononucleotide STR model. The closer this quantity is to 1, the higher the



170 confidence of the called genotype. We also built the model for the *P. falciparum* dataset that did  
 171 not use the reported population origins of each sample as some samples were clearly distinct to the  
 172 majority of samples from a particular country. The model of the *P. falciparum* sample without the  
 173 population origin label was found to produce very similar results (S2 Table). For all further  
 174 analysis only the model with the given population label was used.

175 **Table 1.** Multivariable logistic regression model's estimated coefficients and respective 95% confidence intervals. The model  
 176 was fitted on the *P. falciparum* dataset.

|                                    | <b>Variable</b> | <b>Coefficient estimate</b> | <b>Lower 95% CI</b> | <b>Upper 95% CI</b> | <b>P values</b> |
|------------------------------------|-----------------|-----------------------------|---------------------|---------------------|-----------------|
| <b>Modeling Mononucleotide STR</b> | (Intercept)     | 0.48                        | 0.38                | 0.59                | <0.001          |
|                                    | Repeat units    | 0.12                        | 0.05                | 0.19                | <0.001          |
|                                    | GC_Diff         | 0.09                        | 0.02                | 0.16                | 0.01            |
|                                    | Missingness     | 0.06                        | -0.01               | 0.12                | 0.1             |
|                                    | Mean_Posterior  | 0.81                        | 0.70                | 0.92                | <0.001          |
|                                    | Mean_stutter    | -0.15                       | -0.24               | -0.07               | <0.001          |
|                                    | He              | 7.00                        | 6.38                | 7.64                | <0.001          |
|                                    | MeanHe          | -3.87                       | -4.57               | -3.17               | <0.001          |
|                                    | MinimumHe       | -0.81                       | -1.03               | -0.57               | <0.001          |
|                                    | MaximumHe       | 2.33                        | 2.08                | 2.59                | <0.001          |
| <b>Modeling Polynucleotide STR</b> | (Intercept)     | 1.55                        | 1.40                | 1.71                | <0.001          |
|                                    | Length          | -0.11                       | -0.18               | -0.04               | 0.003           |
|                                    | Repeat units    | 0.16                        | 0.06                | 0.26                | 0.001           |

|                |        |        |        |        |
|----------------|--------|--------|--------|--------|
| GC_Flank       | 0.11   | 0.05   | 0.17   | <0.001 |
| Mean_Posterior | 0.10   | 0.00   | 0.20   | 0.05   |
| Mean_Stutter   | -0.11  | -0.20  | 0.03   | 0.04   |
| He             | 10.20  | 9.02   | 11.41  | <0.001 |
| MeanHe         | -12.41 | -13.73 | -11.10 | <0.001 |
| JostD          | -1.10  | -1.42  | -0.75  | <0.001 |
| MinimumHe      | -0.48  | -0.84  | -0.12  | 0.009  |
| MaximumHe      | 7.02   | 6.52   | 7.52   | <0.001 |

177

178 We also compared the prediction performance of the *P. falciparum* complete dataset with five-  
179 fold cross-validation (see section Methods). The performance of each dataset is compared in terms  
180 of their receiver–operator–characteristic (ROC) curves and the area-under-the-curve (AUC). The  
181 AUC values of the *P. falciparum* complete dataset is 0.9132 in the mononucleotide STR model  
182 and 0.9527 in the polynucleotide STR model, and these five validation-datasets range from 0.7911  
183 to 0.8209 in the mononucleotide STR model, and 0.8853 to 0.8998 in the polynucleotide STR  
184 model (Fig 1). The performance fluctuation depends on the size of the datasets. The predictive  
185 performance in the whole dataset was generally superior to that in the smaller training datasets (S2  
186 and S3 Figs). This was observed in both the *P. falciparum* mononucleotide STR and  
187 polynucleotide STR models, suggesting that larger datasets may improve prediction power. In this  
188 work, we select the whole *P. falciparum* dataset with a higher AUC value to perform all subsequent  
189 analyses. The model of the *P. falciparum* sample without the population origin label also showed  
190 high performance for both the mononucleotide STR (AUC=0.9198) and polynucleotide STR  
191 (AUC=0.9589). The *P. falciparum* model was observed to be very stable, with regards to which

192 measures of quality were used in the model, and reproducible, with the five-fold cross validation  
193 sets giving very similar results in both the mononucleotide and polynucleotide STR models.

194

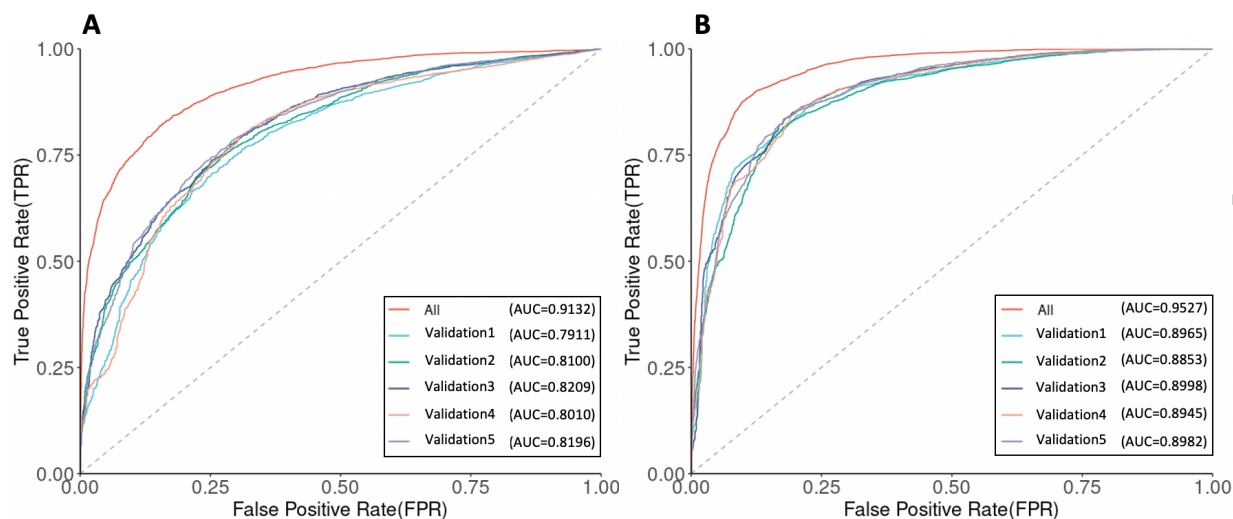

195

196 **Fig 1.** ROC curves and AUC values of the *P. falciparum* complete dataset and five validation-datasets. (A) The mononucleotide  
197 STR model. (B) The polynucleotide STR model.

198 For the *P. vivax* dataset, features that were most significantly associated with the STR quality are  
199 summarised in S3 Table. The *P. vivax* model also showed high performance for both the  
200 mononucleotide STR (AUC=0.9186) and polynucleotide STR (AUC=0.9548). For the *P. vivax*  
201 mononucleotide STR and polynucleotide STR models, the STR quality is also more associated  
202 with the STR features that capture population specific aspects of the dataset, showing similar  
203 results as *P. falciparum*. However one of the STR variables, MinimumHe, displayed an opposite  
204 relationship compared to the *P. falciparum* STR models. For *P. vivax*, four countries have few  
205 samples (< 5), which may affect the robustness of the MinimumHe estimate and thus may have  
206 led to this difference. To investigate this, we also built the model of the *P. vivax* sample without  
207 the population origin labels, wherein the smallest group was now 23 samples. The results obtained

208 for the estimated coefficients for both the mononucleotide STR and polynucleotide STR models  
209 are in S4 Table. The model of the *P. vivax* sample without the population origin label also showed  
210 high performance for both the mononucleotide STR (AUC=0.9295) and polynucleotide STR  
211 (AUC=0.9596). It was found to produce very similar results for the statistically significantly ( $P <$   
212 0.001) associated STR variables, and additionally, the MinimumHe variable showed the same  
213 negative relationship as in the *P. falciparum* STR models.

214 Based on the predicted probability of the logistic regression model, for the *P. falciparum*  
215 mononucleotide STR model, we select the predicted probability greater than 0.6 as the cut-off  
216 value to retain high-quality STRs, while for the *P. falciparum* polynucleotide STR model we chose  
217 0.8 (see Methods for more details). A total of 6,768 high-quality STR (2,563 mononucleotide STR  
218 and 4,205 polynucleotide STR) loci were thus selected. The high-quality STRs have been made  
219 available through an interactive web-based application for instant data exploration and  
220 visualization, and can be accessed at <https://github.com/bahlolab/PlasmoSTR>. The STRs with a 1-  
221 3 bp repeat unit in the 3,047 *P. falciparum* 3D7 samples account for 83.05% of all retained STRs.  
222 Of these, homopolymeric tracts account for 37.87%. The dinucleotide repeats account for a further  
223 26.06% (Fig 2A). The motif size of STRs showed differential distribution among various genomic  
224 features (Fig 2B). The frequency of the trinucleotide repeats is higher in coding regions than in  
225 intronic, intergenic, and promoter regions, which has been previously observed in other species,  
226 including humans and is an example of survivorship bias with non 3-mer motifs likely to disrupt  
227 the transcript and be deleterious causing strong selection against such STRs in coding regions[33-  
228 35]. Introns and intergenic regions mostly show a similar distribution except for the  
229 mononucleotide STRs which are enriched in intergenic regions. Promoters also show a difference

230 in the proportions of different motif sizes compared to the non-coding regions with an abundance  
231 of highly polymorphic dinucleotide (2 bp) STRs.

232 For the *P. vivax* mononucleotide STR model, we selected the predicted probability greater than  
233 0.6 as the cut-off value to retain high-quality STRs, while for the *P. vivax* polynucleotide STR  
234 model we chose 0.2. A total of 3,496 high-quality STR (1,648 mononucleotide STR and 1,848  
235 polynucleotide STR) loci were therefore selected (Fig 2C and 2D). Compared with *P. falciparum*,  
236 *P. vivax* has fewer 2 bp repeats and more 1, 8 and 9 bp repeats. The distribution of high quality  
237 STRs motif sizes (1-9 bp) of the 3,047 *P. falciparum* samples and 174 *P. vivax* samples were  
238 significantly associated with the motif size composition of the reference genome (Chi-square test,  
239 *P. falciparum*:  $P < 2.2 \times 10^{-16}$ ; *P. vivax*:  $P < 2.2 \times 10^{-16}$ ), as well as the distribution of STRs  
240 among various genomic features (Chi-square test, *P. falciparum*:  $P = 0.0059$ ; *P. vivax*:  $P < 1.32 \times$   
241  $10^{-6}$ ).

242

243

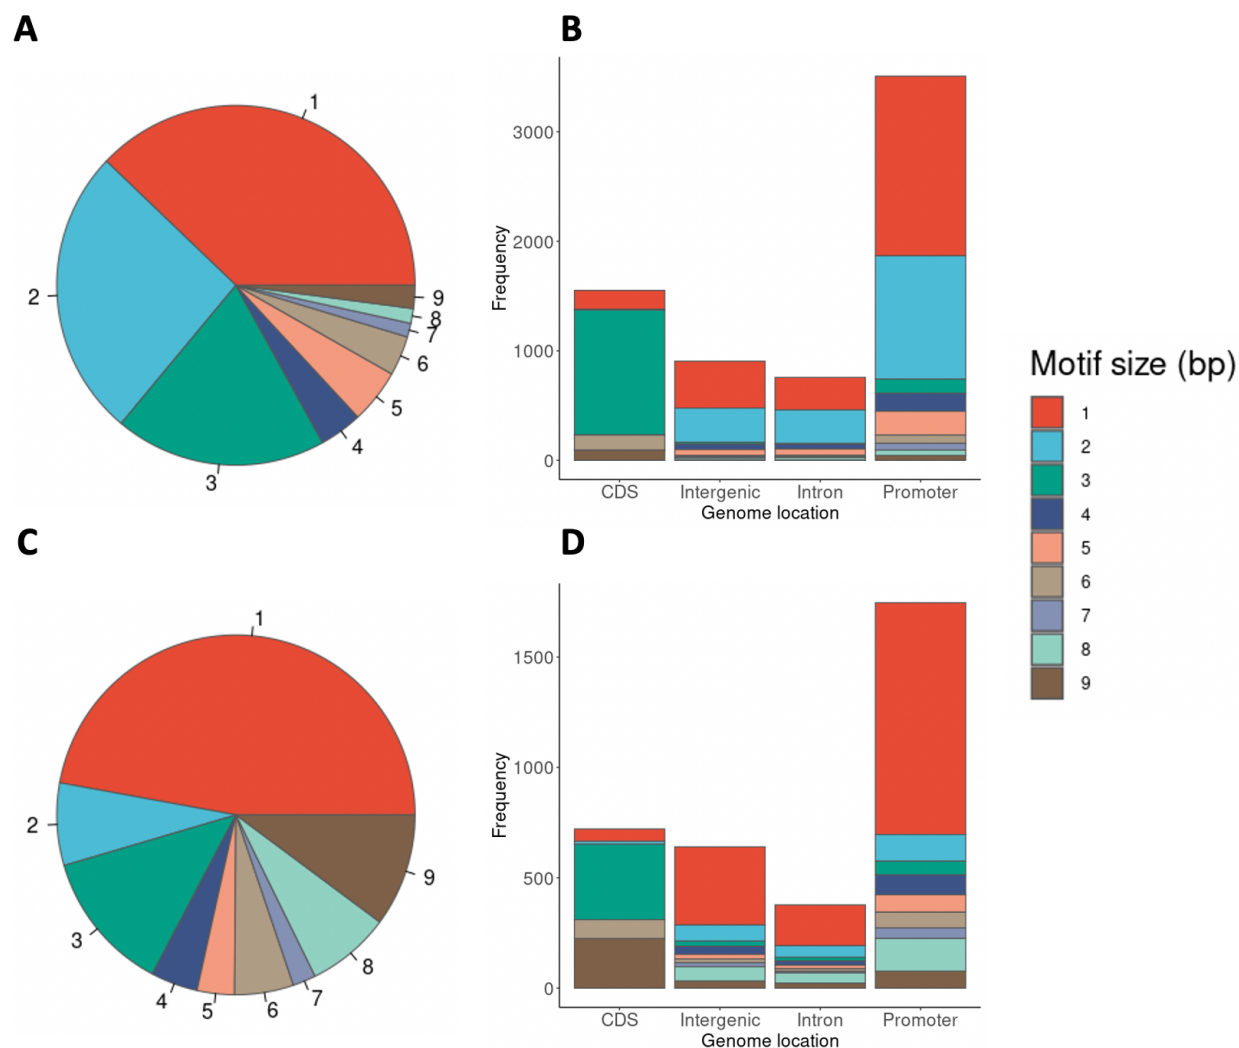

244

245 **Fig 2.** (A) Distribution of motif sizes (1-9 bp) of the 3,047 *P. falciparum* samples, colored by the motif size. (B) Motif size  
246 dependent distribution of STRs among various genomic features of the 3,047 *P. falciparum* samples. (C) Distribution of motif sizes  
247 (1-9 bp) of the 174 *P. vivax* samples. (D) Motif size dependent distribution of STRs among various genomic features of the 174 *P.*  
248 *vivax* samples. The genomic features are labeled along the X-axis for (B) and (D). The frequencies of each motif size are calculated  
249 as the total bases covered by STRs of a given motif size divided by the total bases covered by all STRs, labeled along the Y-axis.

## 250 Population structure analysis

251 We investigated the population genetic structure of the global *P. falciparum* and *P. vivax* parasite  
252 population by performing dimensionality reduction analyses, applying both uniform manifold  
253 approximation and projection (UMAP) and principal component analysis (PCA), and generating

254 neighbour-joining trees (NJTs) for all *P. falciparum* and *P. vivax* samples based on the SNP and  
255 STR genotypes. For the *P. falciparum* dataset, UMAP on the top five PCs of both SNP and STR  
256 genotypes can distinguish the SAM, OCE, SAS, Asia (WSEA, ESEA), and Africa (WAF, CAF,  
257 EAF) parasite populations from different geographic regions, with each of these populations being  
258 more strongly differentiated from all other populations, but the SNP data from the WSEA and  
259 ESEA populations suggest greater genetic similarity between these populations than the matching  
260 STR data. Conversely, the STR data of African sub-regions appear to be genetically more similar  
261 than the corresponding SNP data suggests (Fig 3A and 3B). All population subdivisions supported  
262 by the UMAP analyses were also present in the PCA analysis (S4 Fig). In general, the global *P.*  
263 *falciparum* parasite population formed four distinct clusters: SAM, Africa (WAF, CAF, EAF),  
264 OCE, and the Asia (WSEA, ESEA) region. This clustering may be affected by a variety of factors,  
265 including vector species, varying malaria transmission intensity, and the historical usage of  
266 antimalarial drugs, all of which are confounded by the time of collection of the samples. To further  
267 explore clustering patterns and investigate the average genetic dissimilarity between pairs of  
268 individuals, phylogenetic analysis was performed to produce a neighbor-joining tree. The  
269 neighbor-joining trees also recapitulate the population structure from the clustering analyses (Fig  
270 3C and 3D). Overall the STR data recapitulates the broad geographical structure of the SNP data,  
271 but provides greater resolution of distinct samples at the local scale.

272 For the *P. vivax* dataset, the PCA analysis (S5 Fig) of both SNP and STR genotypes revealed  
273 several distinct clusters that were similar to previous studies[28, 29]: South America (Brazil,  
274 Colombia, Peru), Mexico, Southeast Asia (Thailand, Vietnam, Myanmar, Cambodia), PNG,  
275 Indonesia and Malaysia. The UMAP analyses and neighbor-joining trees (S6 Fig) also  
276 recapitulates the population structure from the clustering analyses.

277 For the sub-population structure analysis from the *P. falciparum* dataset, we found that Ethiopia  
278 was genetically distinct from other EAF countries, and that the two countries of Colombia and  
279 Peru in the SAM population were also genetically distinct (S7 Fig). This was observed in both the  
280 STR and SNP data.  
281

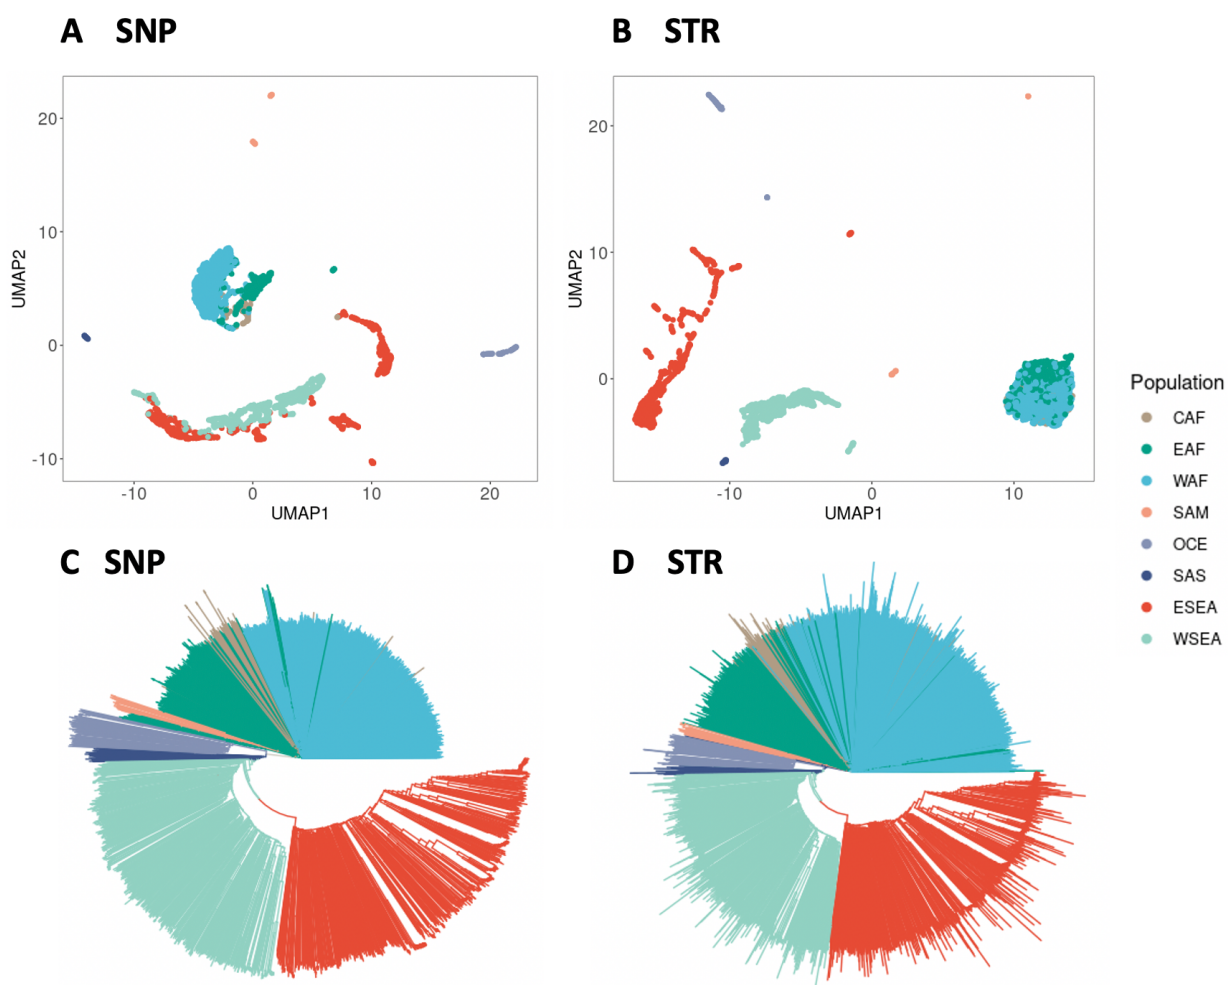

282

283 **Fig 3.** Population structure analysis of the 3,047 *P. falciparum* samples of SNP and STR data. (A) UMAP clustering of the top five  
284 principal components of the SNP data, colours representing the eight different populations. (B) UMAP clustering of the top five  
285 principal components of the STR data with different. (C) NJTs based on the SNP data. (D) NJTs based on the STR data. Branches  
286 are colored according to the population.



## 287 **Genome-wide genetic differentiation**

288 Estimates of population and country differentiation in the *P. falciparum* and *P. vivax* dataset  
289 calculated using the STR data were highly correlated with those calculated using the SNP data for  
290 both *Jost's D* and  $F_{ST}$  (S8 and S9 Figs). Similar to some previous studies[36-38], we found *Jost's*  
291 *D* and  $F_{ST}$  tended to produce values higher in magnitude with STRs than with SNPs. The bi-allelic  
292 SNP loci limit the information content per locus compared to the more polymorphic STR markers,  
293 which have higher allelic diversity per locus and therefore result in higher estimates of *Jost's D*  
294 and  $F_{ST}$ .

295 There were significant associations between geographic and genetic distances at the population  
296 and country level for both SNP and STR data (*P. falciparum*: Mantel test based on pairwise  $F_{ST}$ ,  
297 Fig 4; Mantel test based on pairwise *Jost's D*, S10 Fig; *P. vivax*: *Jost's D* and  $F_{ST}$ , S11 Fig),  
298 indicating that genetic differentiation in populations might be the result of isolation by geographic  
299 distance. For the *P. falciparum* dataset, we observed that the genetic differentiation between SAM  
300 and ESEA is the largest for both SNP and STR data (genome-wide average SNP  $F_{ST}$  0.11, STR  
301  $F_{ST}$  0.30), and that this geographic distance is also the largest among the populations for both SNP  
302 and STR  $F_{ST}$ . It is worth noting that the genetic differentiation was much larger within the Asia  
303 region (SAS, ESEA, WSEA) than within the Africa region (CAF, WAF, EAF), despite the  
304 geographic distances being much larger in Africa. This may be due to the higher transmission  
305 intensity within Africa[39]. For the country level of the *P. falciparum* dataset, within the Africa  
306 region, we identified some country pairs that had higher genetic differentiation both in SNP and  
307 STR data, this being driven by the Ethiopian genetic differences, which is consistent with the  
308 previous studies demonstrating that Ethiopia is a distinct sub-population[27, 40].

309

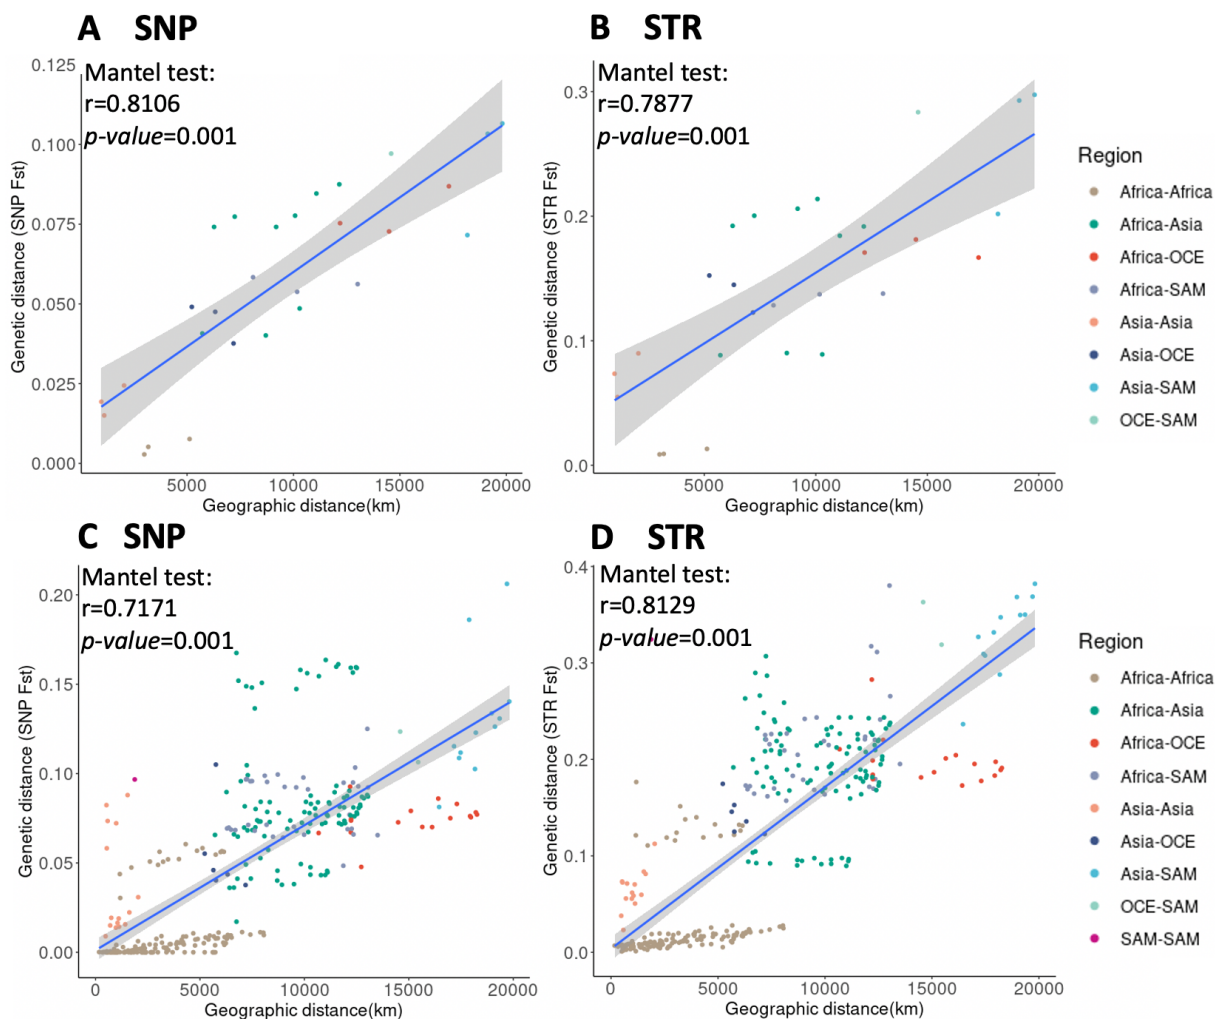

310

311 **Fig 4.** Pairwise genetic distance ( $F_{ST}$ ) and geographical distances (km) between populations and countries of *P. falciparum*. (A)  
312 SNP data of population pairs. (B) STR data of population pairs. (C) SNP data of country pairs. (D) STR data of country pairs. A  
313 Mantel test was used to measure the association.

### 314 Selection signatures related to geographic differentiation

315 We performed genome-wide scans of the pairwise *Jost's D* values in an attempt to identify regions  
316 that were differentiated between the populations or the countries in the *P. falciparum* and *P. vivax*  
317 dataset. Several genomic regions with high *Jost's D* values were detected at both the global level

318 (different regions) and the local level (different countries). A summary of these comparisons  
319 between the *P. falciparum* populations is shown in S5 Table, and the comparison between the *P.*  
320 *vivax* countries is shown in S6 Table.

321 At the global level in the *P. falciparum* dataset, we found three STRs located in coding regions  
322 (within PF3D7\_0810600, PF3D7\_0810900, PF3D7\_0811200) which were highly differentiated  
323 between the CAF, EAF, and WAF populations. All three STRs were located on chromosome 8,  
324 0.59–12.3 kb from the drug resistance gene *Pfdhps* (PF3D7\_0810800, dihydropteroate synthase)  
325 (Fig 5A). The first of these STRs (*Jost's D*=0.52), located within PF3D7\_0810600 (chromosome  
326 8 544,455-544,481 kb) is composed of an ‘AAT’ motif (Fig 5A). 78% samples in CAF and 77.99%  
327 samples in WAF have the same genotype as the Pf3D7 reference genome of nine ‘AAT’ motifs,  
328 whereas 86.23% samples in EAF have two ‘AAT’ insertions. The nonsynonymous mutation  
329 (Pf3D7\_08\_v3:g.543210G>T) in PF3D7\_0810600 were detected in artemisinin-resistant cell lines  
330 by Frances et al. that might play a role in gene expression regulation and subsequently contribute  
331 to the artemisinin resistance phenotypes[41].

332 The second of the three coding STRs is located between the genome reference coordinates  
333 2,260,430-2,260,449 kb, within PF3D7\_1455300. It consists of an ‘AAT’ motif, which was highly  
334 differentiated between the Africa region (CAF, EAF, WAF) and the Southeast Asia region (WSEA,  
335 ESEA) (Fig 5B). 81.02% of samples in the Africa region have the Pf3D7 reference genotype of  
336 seven ‘AAT’ motifs, whereas 97.17% of samples in the Southeast Asia region have two ‘AAT’  
337 deletions. PF3D7\_1455300 is a conserved *Plasmodium* protein that plays a role in DNA mismatch  
338 repair. According to previous work[42], it is a candidate molecular marker for altered DNA repair  
339 capability. SNP mutations previously found in this gene may be associated with the phenotype of

340 accelerated resistance to multiple drugs (ARMD). Also, the SNP mutations identified in  
341 PF3D7\_1455300 (Pf3D7\_14\_v3:g.2260945T>G) by Xiong et al. have a high frequency in the  
342 Southeast Asia population, but cannot be found in African populations, which may be due to  
343 selection and thus be a signature for the Southeast Asia population selection signal[42]. In our  
344 study, we also found that the STR mutations in PF3D7\_1455300 are significantly different in  
345 Southeast Asia and Africa. Aside from this locus, another STR within PF3D7\_1431400 (surface-  
346 related antigen) is located between the genome reference coordinates 1,234,853-1,234,865 kb and  
347 consists of a monomer 'T' motif, which also showed high differentiation (Fig 5B). 97.76% samples  
348 in Africa have the Pf3D7 reference genotype of 13 'T' motif repeats, whereas 89.52% samples in  
349 Southeast Asia have an insertion of 24 'T' repeats.

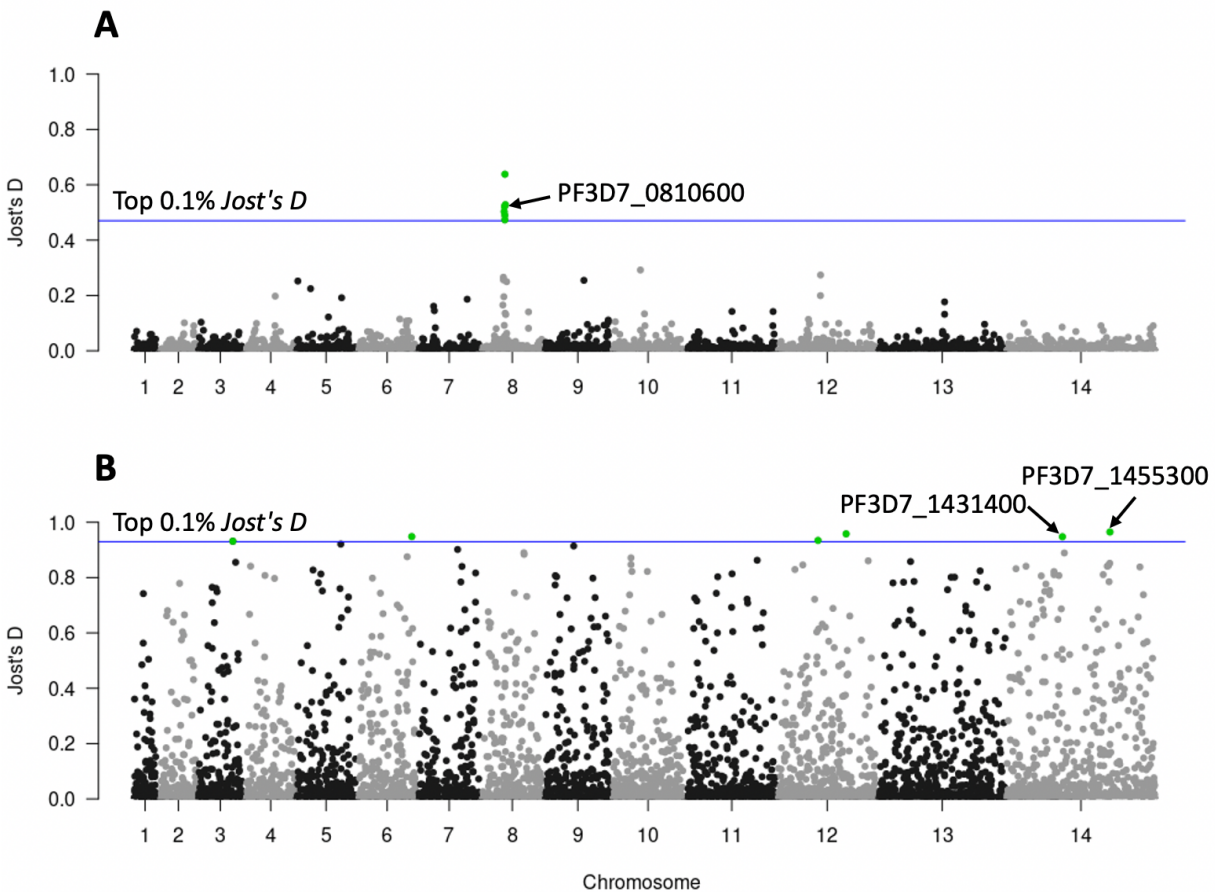

350

351 **Fig 5.** Genome scans for differentiation, as measured by *Jost's D* values. (A) CAF, EAF, and WAF samples. (B) Africa region  
352 (CAF, EAF, WAF) with Southeast Asia (WSEA, ESEA) region samples. The x-axis represents the chromosomes and the y-axis  
353 the *Jost's D* values. Each point represents an STR locus with a total 6,768 STRs represented. The blue horizontal line represents  
354 the threshold based on the top 0.1% *Jost's D* values.

355 At the local level in the *P. falciparum* dataset, we also found several STRs which showed  
356 differentiation between countries. Within WAF countries, we identified a set of STRs located in  
357 coding regions of the genome, with potentially direct functional impact. These STRs appeared to  
358 be under positive directional selection: PF3D7\_0627800 (acetyl-CoA synthetase), which was  
359 predicted as being under balancing selection[43]; and PF3D7\_0826100 (HECT-like E3 ubiquitin  
360 ligase), found to be possibly involved in a mechanism of drug resistance to pyrimethamine[44, 45]  
361 and which may also be involved in reduced susceptibility to quinine and quinidine[46].  
362 Additionally we also identified STRs in the coding regions of PF3D7\_0416000 (RNA-binding  
363 protein); PF3D7\_0811000 (cullin-1); PF3D7\_0811200 (ER membrane protein complex subunit 1);  
364 PF3D7\_1210400 (general transcription factor 3C polypeptide 5), PF3D7\_1409100 (aldo-keto  
365 reductase) and two conserved proteins with unknown function: PF3D7\_0107100 and  
366 PF3D7\_0604000. Within EAF countries, selection signals included STRs in PF3D7\_0628100  
367 (HECT-domain (ubiquitin-transferase), which was previously observed to have a strong signature  
368 of deviation from neutrality in Gambia based on STR analysis[47]; PF3D7\_0527900 (ATP-  
369 dependent RNA helicase DDX41); PF3D7\_1212900 (bromodomain protein 2); PF3D7\_1331100  
370 (DNA polymerase theta); and three conserved proteins with unknown function: PF3D7\_0526600,  
371 PF3D7\_0810900 (0.59kb away from the drug resistance gene *Pfdhps*) and PF3D7\_1448500. Two  
372 STRs within PF3D7\_1433400 (PHD finger protein PHD2) and PF3D7\_0926600 (conserved  
373 *Plasmodium* membrane protein, unknown function) were highly differentiated between WSEA  
374 countries. Several STRs located in the coding region were also found to be highly differentiated

375 between ESEA countries. PF3D7\_1225100 (isoleucine--tRNA ligase); PF3D7\_0826100 (HECT-  
376 like E3 ubiquitin ligase); PF3D7\_1317900 (nucleolar complex protein 4); and two conserved  
377 protein with unknown function: PF3D7\_1233200 and PF3D7\_1303800.

378 We extracted the top ten most highly differentiated STRs from each pairwise population and  
379 country comparison to determine if a small number of highly differentiated STRs could represent  
380 population structure. The minimum spanning network can distinguish between two distinct groups  
381 of samples (*P. falciparum*: Fig 6; *P. vivax*: S12 Fig). The top ten most highly differentiated STRs  
382 from each pairwise comparison of the *P. falciparum* and *P. vivax* dataset have been made available  
383 through the R shiny PlasmoSTR, accessible at <https://github.com/bahlolab/PlasmoSTR>. From the  
384 analyses, we can identify STR mutations that are fixed in one population but that are distinct from  
385 other populations and which may become a signature for the specific population.

386

387

388

389

390

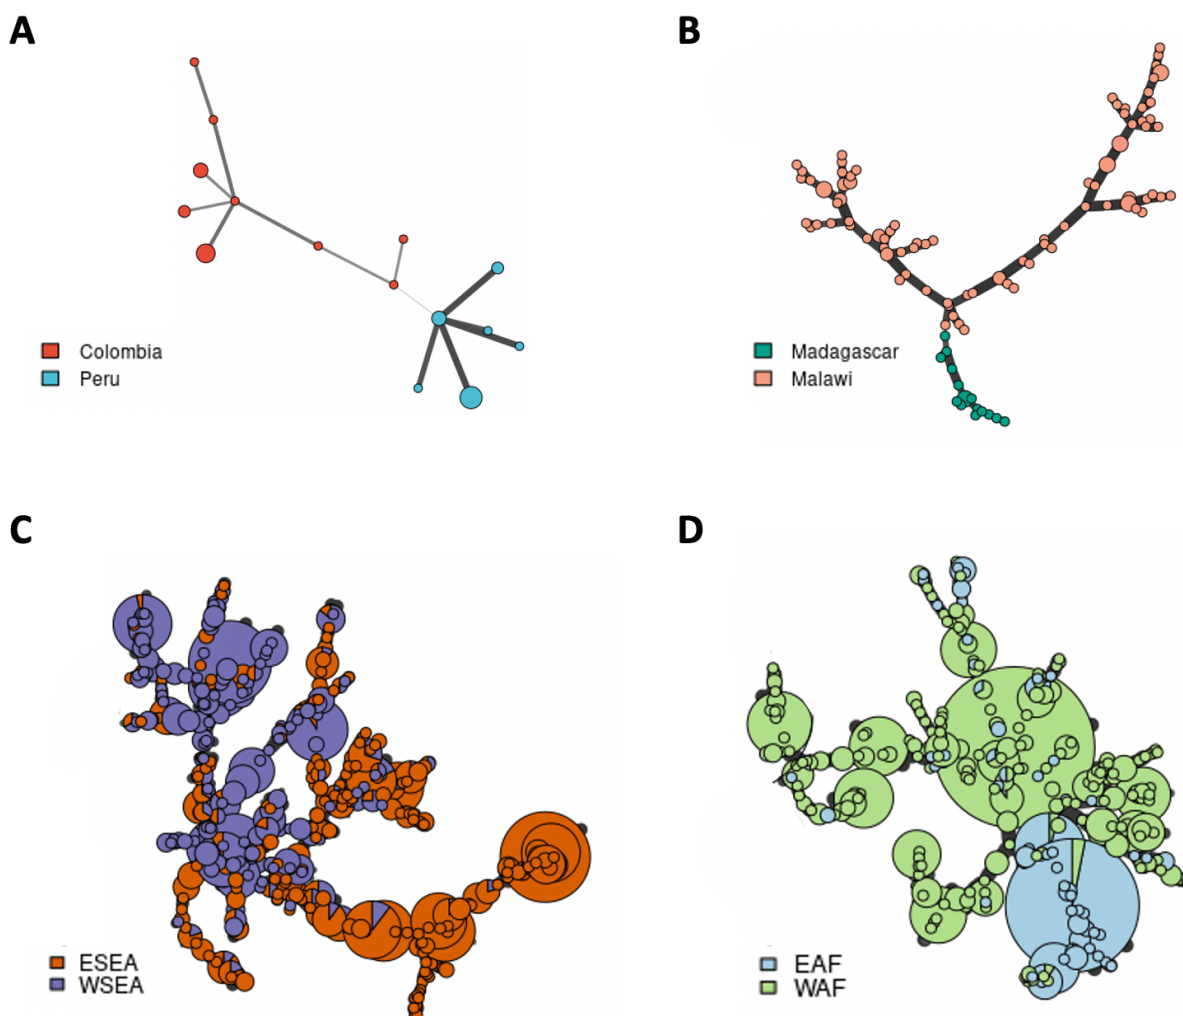

391  
392 **Fig 6.** Minimum spanning network using Bruvo's distances based on the ten most informative STR markers showing the  
393 relationship among two groups of *P. falciparum* isolates. (A) Colombia and Peru from the SAM population. (B) Madagascar and  
394 Malawi from the EAF population. (C) ESEA and WSEA populations. (D) EAF and WAF populations. Colors correspond to the  
395 country or population. Node sizes correspond to the number of samples. Edge lengths are arbitrary.

### 396 **Selection signatures related to drug resistance**

397 Resistance of malaria parasites to chloroquine is known to be associated with the parasite protein  
398 *Pfcr*. Samples were classified as chloroquine-resistant if they carried the *Pfcr* 76T allele[27].  
399 Chloroquine-resistance was found in almost all samples from SAM, OCE, SAS, WSEA, and ESEA.

400 It was also found across the Africa region (WAF, CAF, EAF), but the frequency is low, especially  
401 in EAF. However, it is noteworthy that all samples from Ethiopia were classified as chloroquine-  
402 resistant as they all carried the *Pfcr*t 76T allele, and also displayed a higher genetic differentiation  
403 with both SNP and STR data with other EAF countries. To identify regions with signatures of  
404 selection that may be associated with chloroquine resistance, we calculated the *Jost's D* per STR  
405 genome-wide among the 57 EAF drug-resistant and 269 EAF drug-sensitive samples. Average  
406 genome-wide *Jost's D* estimates were 0.011, considering the top 0.1% *Jost's D* threshold,  
407 signatures of selection were detected at six STR loci that had *Jost's D* values > 0.36, located on  
408 chromosomes 7, 11, and 14 (Fig 7A). Three STRs were located on chromosome 7, 1.7–22.2 kb  
409 from the drug resistance associated gene *Pfcr*t (PF3D7\_0709000, chloroquine resistance  
410 transporter), demonstrating that drug selection produces chromosomal segments of selective  
411 sweeps as we have previously demonstrated with SNP data[48]. One of these STRs (*Jost's D*=0.82)  
412 was located in the genomic promoter region between the genome reference coordinates 392,230-  
413 392,268 kb which consists of an 'AT' motif. Interestingly, all of the drug-resistant samples in  
414 Ethiopia have one 'AT' deletion compared to the reference genome (S13A Fig), where the EAF  
415 drug-sensitive samples range from the six 'AT' deletion to 11 'AT' insertion (S13B Fig). The  
416 length of the promoter region is gene-specific, and the levels of gene expression can be increased  
417 or decreased by expanding and contracting in length[49]. This is known as an STR expression  
418 quantitative trait locus (STReQTL). To demonstrate this is a true STReQTL would require a dual  
419 WGS, RNA sequencing (RNA-seq) dataset for the parasite or alternatively a lab-based  
420 investigation of expression levels for the different STR genotypes.

421 Artemisinin resistance of malaria parasites is known to be associated with the *Pfk13* (kelch 13)  
422 gene, and samples were classified as artemisinin-resistant if homozygous non-synonymous



423 mutations occurred in the kelch13 BTB/POZ and propeller domain1. Artemisinin-resistant  
424 samples were only found in samples from WSEA and ESEA. We observed that in the ESEA  
425 population almost all samples from Laos were classified as artemisinin sensitive, while almost all  
426 samples from Thailand were classified as artemisinin resistant. To identify genomic regions under  
427 selection due to artemisinin resistance, we calculated the *Jost's D* per STR genome-wide among  
428 the 77 drug-sensitive samples in Laos and 16 drug-resistant samples in Thailand. The average  
429 genome-wide *Jost's D* estimate was 0.086. Signatures of selection were detected at six STR loci  
430 that had *Jost's D* values > 0.95, located on chromosome 5, 12, 13, and 14 (Fig 7B). One particular  
431 STR (*Jost's D*=0.99) on chromosome 12, within the *api-IRS* (isoleucine--tRNA ligase) gene  
432 (PF3D7\_1225100; STR position 1,023,293-1,023,313), has a variable length 'AAT' motif. Fifteen  
433 out of the 16 of the drug-resistant samples in Thailand have three 'AAT' insertions, whereas the  
434 drug-sensitive samples in Laos vary from the two 'AAT' deletions to two 'AAT' insertions. Strong  
435 signatures of differentiation (*Jost's D*=0.98) were also observed within the *NOC4* (nucleolar  
436 complex protein 4) gene (PF3D7\_1317900; STR position 744,342-744,366) which consists of an  
437 'ATT' motif. Fifteen out of 16 of the drug-resistant samples in Thailand have three 'ATT'  
438 insertions, where the drug-sensitive samples in Laos range from the one 'ATT' deletion to three  
439 'AAT' insertions, 70.13% have the same genotype as the reference genome.

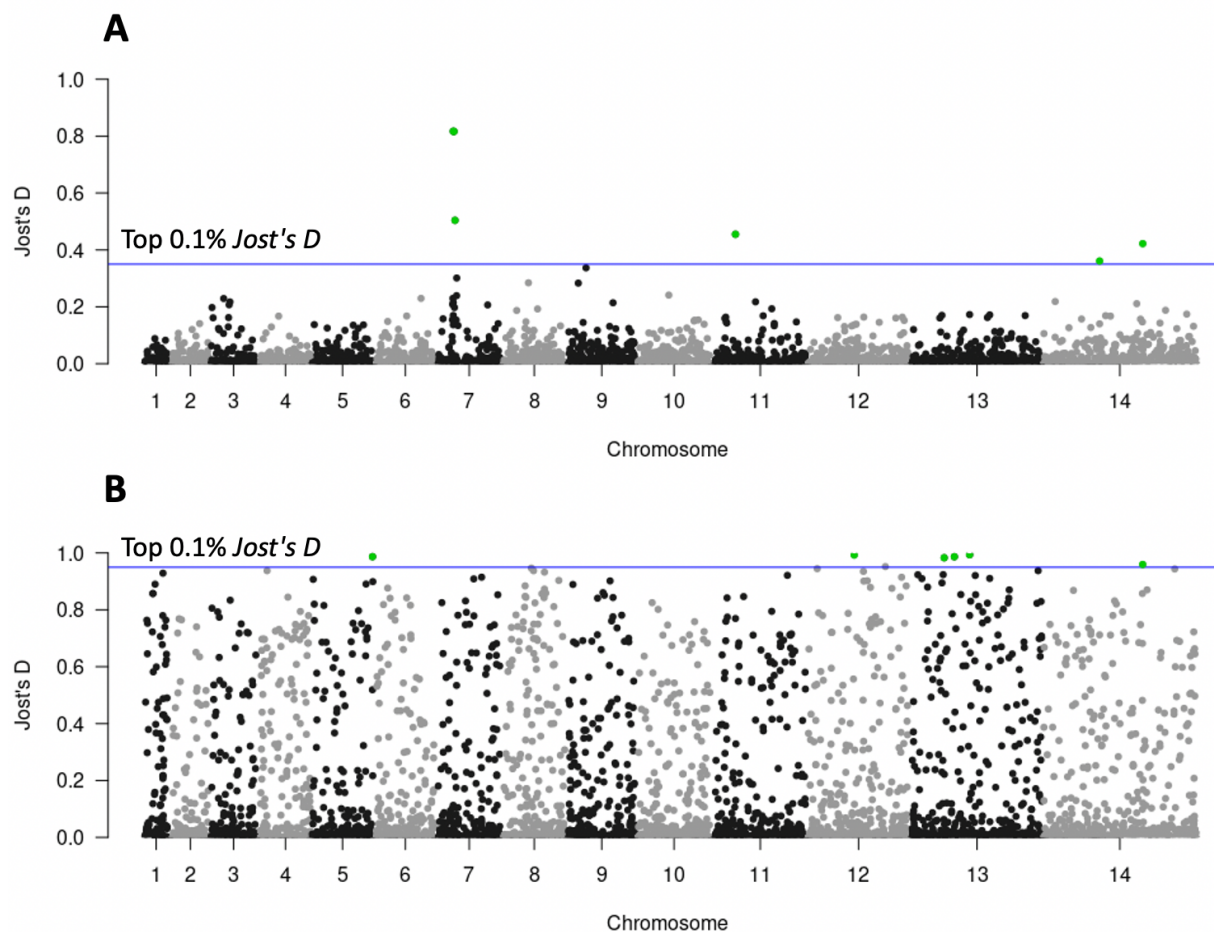

440  
441 **Fig 7.** Genome scans for differentiation for kelch13 drug resistance. (A) 57 EAF drug-resistant and 269 EAF drug-sensitive samples.  
442 (B) 16 drug-resistant samples in Thailand and 77 drug-sensitive samples in Laos. The x-axis represents the chromosomes and the  
443 y-axis the *Jost's D* values. Each point represents a STR loci. The blue horizontal line represents the threshold based on the top 0.1%  
444 *Jost's D* values.

## 445 Discussion

446 In this study we genotyped thousands of STRs applying an *in-silico* or bioinformatic approach  
447 (HipSTR). We performed STR genotyping for the first time on the *P. falciparum* and *P. vivax*  
448 genomes comprising more than 3,000 *P. falciparum* and 174 *P. vivax* WGS samples, obtained  
449 from across the world. To our knowledge this is the first time this has been attempted for this

450 population dataset and a dataset of this size. To measure HipSTR's quality of prediction, we use a  
451 set of *P. falciparum* STR markers[50], which have been genotyped with gel electrophoresis (GE)  
452 within a subset of the in-house *P. falciparum* samples. A strong linear relationship between GE  
453 allele calls against HipSTR's calls can indicate that HipSTR is predicting genotypes adequately.

454 STRs are an important source of genetic diversity, and are generally more informative than SNP  
455 markers due to the higher number of variants per locus. STRs also have a much higher mutation  
456 rate ( $4.43 \pm 0.37 \times 10^{-7}$  per locus per asexual cycle for *P. falciparum*), ~1,000 times higher than  
457 SNPs ( $3.18 \pm 0.74 \times 10^{-10}$  base substitutions per site per asexual cycle for *P. falciparum*)[4].  
458 This may capture very recent evolution more robustly and could be used to distinguish closely  
459 related samples in clonal outbreaks and could potentially be used to distinguish whether the  
460 recurrent infection represents reinfection or recrudescence. The ability to do so is an important tool  
461 for countries aiming for elimination of *P. falciparum* or *P. vivax* malaria and is particularly  
462 important for *P. vivax* with its ability to reactivate malaria from its dormant liver stage.

463 STRs are not routinely analyzed across the whole genome with short read sequencing data because  
464 they are difficult to identify and genotype accurately, requiring rigorous QC. In order to attain  
465 reliable sets of STRs, some studies have sequenced each sample twice as a technical replicate and  
466 used multiple STR calling algorithms to test variant calling accuracy and keep the high-quality  
467 STRs[4, 51]. However, it is not possible or even practical to use these filtering approaches in large-  
468 scale field samples where there are unlikely to be technical replicates. Furthermore, technical  
469 replicates are only able to identify a limited set of problematic STRs. To overcome these  
470 limitations in the current study, we developed a novel method for quality control of STR  
471 genotyping data based on gold standard SNP genotyping data from the same cohort. We

472 demonstrated that this was a successful approach and replicated it in a second *Plasmodium* species,  
473 *P. vivax*, demonstrating that this is a method which can be broadly applied to many other species.  
474 Our results provided new insights for further exploration of STRs across the whole genome.

475 We built separate multivariable logistic regression modelling for measurement and prediction of  
476 the quality of STRs for the mononucleotide STR and polynucleotide STRs. This is because  
477 genotyping homopolymers is particularly challenging for many STR tools, including HipSTR, and  
478 has a high error rate[26] which has led them to be discarded altogether for other studies[23]. For  
479 both the mononucleotide STR and polynucleotide STR model, the STR quality is highly influenced  
480 by the STR features that capture population specific aspects of the cohort, while the  
481 mononucleotide STR quality is also highly influenced by HipSTR's Mean\_Posterior metric, a  
482 parameter that indicates the quality of the called STR genotype. Higher allelic diversity STRs  
483 indicate greater genetic variability among the samples, hence we also considered the effect of  
484 extremely polymorphic STRs using some additional parameters in our models: population  
485 differentiation (*Jost's D*), and mean, maximum and minimum heterozygosity across the different  
486 populations, to tease apart the drivers of high-quality STRs based on population-dependent  
487 measures. This population-dependence also led us to fit models using naive clustering based labels,  
488 however these produced very similar results but are useful QC steps in cohort studies, especially  
489 if reported population membership is uncertain. Our models showed high AUC values both in the  
490 mononucleotide STR and polynucleotide STR model, which can effectively combine a range of  
491 different STR features to predict the STR quality.

492 Genome-wide SNP genotyping[27, 52, 53] and a set of STR markers (<20) genotyped using lab-  
493 based approaches such as capillary genotyping [14-16] have been employed in several studies to

494 reveal the *P. falciparum* and *P. vivax* genetic diversity and population structures. However, the  
495 overall contributory effect of STR variation in *P. falciparum* and *P. vivax* has not been evaluated  
496 using genome-wide sequencing data from a larger collection of samples representing the global  
497 distribution due to the limitations of scaling up of the lab-based STR genotyping approaches.

498 Our clustering results, investigating parasite population genetics, demonstrated general agreement  
499 of clustering by the population of origin between SNP and STR markers. For the *P. falciparum*  
500 dataset, the overall population genetic structure of parasites represents four distinct groups: SAM,  
501 OCE, Asia (SAS, WSEA, ESEA), and Africa (WAF, CAF, EAF) populations. PCA shows the  
502 SNP data resulted in tighter groups of individuals compared to the somewhat loose clusters of  
503 individuals with STRs data. The neighbor-joining trees based on IBS analysis showed that STR  
504 data have a higher power to identify groups in SAM, EAF, and CAF (213,757 SNP loci versus  
505 6,768 STR loci), this is likely due to STRs that are highly polymorphic and have multiple alleles  
506 thus providing higher information content as compared to the biallelic SNPs. There is some  
507 circularity in these results since our QC measure was predicated on capturing geographic  
508 information. Nonetheless this was a general approach and the clustering analysis is a finer-scale  
509 method which further supported the validity of the approach.

510 Significant Mantel correlations between geographical and genetic distances (based on  $F_{ST}$  and  
511 *Jost's D*) at the population and country level for both SNP and STR data in the *P. falciparum* and  
512 *P. vivax* dataset were detected, suggesting that genetic differentiation in populations are likely the  
513 result of geographic isolation. The *P. falciparum* parasites from the Africa region (CAF, EAF,  
514 WAF) have lower levels of population structure, and the genetic differentiation within the African  
515 region is lower than within the Asian region (SAS, ESEA, WSEA), although noting that the

516 geographic distances are greater in Africa. This is likely due to the high transmission intensity in  
517 Africa, where individuals are more likely to be infected by more than one *P. falciparum* parasite,  
518 which increases the frequency of recombination, leading to a highly diverse population with low  
519 linkage disequilibrium[39]. At the country level in the *P. falciparum* dataset, it is worth noting  
520 Ethiopia in the EAF population which displayed a higher genetic differentiation with other EAF  
521 countries both in SNP and STR data, which was consistent with the previous study that stated  
522 Ethiopia is a distinct sub-population[27, 40]. In Ethiopia, over 75% of the land surface is at risk,  
523 with varying intensities of malaria, unlike other many African countries, Ethiopia is also unique  
524 in that *P. vivax* is co-transmitted with *P. falciparum*, further evidence of a high malaria burden.  
525 Higher rainfall, temperature, humidity and seasonal transmission in Ethiopia could also be the  
526 driving factors of the higher genetic differentiation[54-56]. Additionally, all of the samples in  
527 Ethiopia were classified as chloroquine-resistant as they carried the *Pfcr*t 76T allele. In contrast,  
528 the same allele was observed at much lower frequencies in other EAF countries[27]. This could  
529 also explain the higher genetic differentiation between Ethiopia and other EAF isolates.

530 To scan the STR genomic loci under divergent selection that might occur due to varying  
531 antimalarial drug use or local differences, *P. falciparum* and *P. vivax* samples were analysed from  
532 the population pairs and the country pairs. For the *P. falciparum* dataset, we identified several  
533 STRs with outlier *Jost's D* values, including strong signatures of genetic differentiation, likely due  
534 to selection, around the chloroquine resistance transporter, *Pfcr*t (PF3D7\_0709000), and  
535 dihydropteroate synthase, *Pfdhps* (PF3D7\_0810800, dihydropteroate synthase). We also identified  
536 several selection signals including the ATP-dependent RNA helicase *Pfdbp1* (PF3D7\_0810600),  
537 which may be associated with artemisinin resistance[41]; the HECT-like E3 ubiquitin ligase *Pfheul*  
538 (PF3D7\_0826100), found to be possibly involved in a mechanism of drug resistance to

539 pyrimethamine[44, 45] and may also be involved in reduced susceptibility to quinine and  
540 quinidine[46]; and a conserved *Plasmodium* protein PF3D7\_1455300 that may be associated with  
541 the phenotype of accelerated resistance to multiple drugs (ARMD)[42]. The STR variations  
542 observed in *P. falciparum* drug-resistant samples may reflect the differences in the historical use  
543 of antimalarial drugs of different countries and may contribute to the development of local malaria  
544 treatment guidelines. Multiple STR loci that had strong signatures of deviation from neutrality  
545 were also detected, which was consistent with previous studies[43, 47]. However, most of the  
546 previous studies detected the selection signatures through association with SNP-based signals,  
547 whereas in our study we found that the STR mutations within different genes also play an important  
548 role. The key question is whether some of these STRs may actually be the driver mechanism  
549 underpinning the selection signals rather than merely showing association due to linkage  
550 disequilibrium. The small changes in the length of STR mutations may alter protein activity,  
551 protein folding efficiency, stability, or aggregation[10], and the levels of gene expression can be  
552 increased or decreased by expanding and contracting in length that allows the parasite to adapt  
553 under selective pressure[49]. These signals could be actively pursued in laboratories to investigate  
554 whether the STR signals directly affect relevant expression signals as STReQTL. Unlike the  
555 human Genotype–Tissue Expression Project (GTEx)[57], a comprehensive public resource,  
556 including both WGS and RNA-seq datasets, which can identify STRs associated with expression  
557 of nearby genes is not available. One limitation in our study is that we are unable to determine if  
558 these STRs are true STReQTL due to the absence of RNA-seq data in the *Plasmodium* datasets  
559 analyzed. Many novel candidate genomic regions that were likely under recent positive directional  
560 selection were also detected in our study, possibly revealing recent signals of selection not yet  
561 observable with SNP markers.

## 562 **Conclusions**

563 In this paper, we report the first large-scale *in-silico* STR study performed in more than 3,000 *P.*  
564 *falciparum* and 174 *P. vivax* WGS worldwide samples. We developed a novel method for quality  
565 control of STR genotyping data based on gold standard SNP genotyping data, which provides new  
566 insights for further exploration of STRs across the whole genome. Furthermore, a set of genome-  
567 wide high-quality STRs were then used to study parasite population genetics and compared to  
568 genome-wide SNP genotyping data, revealing both high consistency with SNP based signals, as  
569 well as identifying some signals unique to the STR marker data. These results demonstrate that the  
570 identification of highly informative STR markers from large population screening is a powerful  
571 approach to study the genetic diversity, population structures and genomic signatures of selection  
572 on *P. falciparum* and *P. vivax*. In addition, the genome-wide information about genetic variation  
573 and other characteristics of STRs in plasmodium have been made readily available in an interactive  
574 web-based R Shiny application PlasmoSTR (<https://github.com/bahlolab/PlasmoSTR>).

## 575 **Materials and Methods**

### 576 **Data**

#### 577 **MalariaGEN global *P. falciparum* dataset.**

578 All samples and metadata were obtained through the MalariaGEN *Plasmodium falciparum*  
579 Community Project (<https://www.malariagen.net/resource/26>)[27]. We retrieved the data in fastq  
580 file format from the Sequence Read Archive (SRA). The *P. falciparum* dataset consists of 3,241



581 monoclonal (within-host infection fixation index  $F_{ws} > 0.95$  downloaded from MalariaGEN)  
582 samples. Metadata was available in the form of population labels for all samples representing the  
583 country of origin of each sample at both a population (8 levels) and country level (27 levels). The  
584 populations were SAM, WAF, CAF, EAF, SAS, WSEA, ESEA and OCE, and the countries were:  
585 Ghana, Cambodia, Bangladesh, Thailand, Colombia, Malawi, Guinea, Uganda, Ethiopia, Mali,  
586 Senegal, Gambia, Mauritania, Peru, Nigeria, Myanmar, Laos, Viet Nam, Kenya, Tanzania, Papua  
587 New Guinea, Burkina Faso, Congo DR, Madagascar, Cameroon, Ivory Coast, and Benin[27].  
588 Based on published genetic markers including SNPs and copy number variations (CNVs), all  
589 samples are classified into different types of drug resistance in the MalariaGEN *Plasmodium*  
590 *falciparum* Community Project[27]. As previously described[27], sequencing was performed  
591 using Illumina HiSeq 2000 paired-end sequencing platform. The *P. falciparum* 3D7 (v3  
592 PlasmoDB-41) was used as the reference genome and was downloaded from PlasmoDB[58]. In  
593 this study, we only considered monoclonal samples because STR genotyping algorithms such as  
594 HipSTR are optimised for diploid and haploid chromosomes, without considering the possibility  
595 of multiplicity of infection (MOI)[1, 23].

#### 596 **Global *P. vivax* dataset.**

597 The dataset for *P. vivax* comprised 353 previously published samples in *Plasmodium vivax*  
598 Genome Variation project (<https://www.malariagen.net/projects/p-vivax-genome-variation>) as  
599 described in Pearson et al.[29] and data from Hupalo et al.[28], which are sampled from multiple  
600 countries around the world. Fastq files were also downloaded from SRA. The whole genome  
601 sequencing was performed using Illumina-based sequencing platforms. The *P. vivax* genome  
602 PvP01 (PlasmoDB release 41) was used as the reference genome and was downloaded from  
603 PlasmoDB[58].

## 604 **Methods**

### 605 **SNP genotyping**

606 SNPs and deletions/insertions (Indels) were called using the standard best practice from Genome  
607 Analysis Toolkit (GATK) version 4.0.12.0 implemented in nextflow[22, 59]  
608 (<https://github.com/gatk-workflows/gatk4-germline-snps-indels>). The pipeline generates a final  
609 joint VCF file for all samples. Variants were further removed with the following filtering  
610 thresholds: Quality of Depth (QD) < 20, Mapping Quality (MQ) < 50, MQ Rank Sum  
611 (MQRankSum) < -2, Strand Odds Ratio (SOR) > 1, and Read Position Rank Sum  
612 (ReadPosRankSum) less than -4 or greater than 4. SnpEff was used to annotate variants based on  
613 the *P. falciparum* 3D7 and *P. vivax* P01 reference genome[60]. SNPs were excluded if they were:  
614 (i) indels, (ii) not biallelic, (iii) variants in genes from the surface antigen (VSA)[61] families, (iv)  
615 not in core genome region defined by Miles et al.[20] for *P. falciparum* and Pearson et al.[29] for  
616 *P. vivax*, (v) if their minor allele frequency (MAF) was less than 1% in all populations, or (vi) their  
617 missing genotype frequency was higher than 10%.

### 618 **STR genotyping**

619 We initially identified the composition and distribution of STRs in the *P. falciparum* 3D7 and *P.*  
620 *vivax* P01 reference genome using Tandem Repeats Finder (TRF Version 4.09)[32]. The  
621 parameters used for TRF were: the alignment weights for matching (Match) equal to 2,  
622 mismatching (Mismatch) penalty is 7, indel (Delta) penalty is 7, the match probability (PM) is 80,  
623 the indel probability (PI) is 10, the minimum alignment score (Minscore) is 20, the maximum  
624 period size (MaxPeriod) (the pattern size of the tandem repeat) to report is 500bp. Additional post-  
625 processing steps of the TRF output files were performed by removing STRs: (i) with overlapping

626 STRs, (ii) with motif period size > 9bp, (iii) repeat number of the motif < 3, (iv) where the percent  
627 of matches  $\leq 85\%$ , (v) where the percentage of indels  $\geq 5\%$ , (vi) the repeat length was larger than  
628 70bp, as the genotype call rate declined for longer tandem repeats. Genome-wide STR genotyping  
629 was performed with HipSTR (Version 0.6.2)[1] using the haploid version under the default  
630 parameters. STRs were then excluded if they were from VSA[61] families, or if they were not in  
631 the core genome[20, 29], or if their missing genotype rate was higher than 10%. The  
632 VariantAnnotation[62] R package (Version 1.32.0) was used to annotate variants making use of  
633 the Pf3D7 and PvP01 gene annotation in GFF format.

634 To measure HipSTR's quality of prediction, we used 10 *P. falciparum* STR markers proposed by  
635 Anderson et al. (1999)[50]. These markers have been genotyped with GE on Applied Biosystems  
636 3700 (ABI3700) within a subset of in-house *P. falciparum* samples. Whole-genome sequencing  
637 was also performed on these samples. GE is typically taken to be the gold standard for STR  
638 genotyping. GE data was only available for Milne Bay and East Sepik samples (90 samples). S7  
639 Table represents the set of markers we have for *P. falciparum* in addition to how many samples  
640 had genotypes called by HipSTR at these specific markers. The locations of the markers were  
641 obtained by using a BLAST search with PlasmoDB[58] on the primer sequences for each STR  
642 marker which were presented in Anderson et al. (1999)[50]; Figan et al. (2018)[16]; Greenhouse  
643 et al. (2006)[63]. Given that the locations of the markers are known, we can compare HipSTR's  
644 genotype calls to the length of the STR markers as determined by the GE procedure. It is important  
645 to note that the reported length of STRs from GE are generally shifted by a fixed number of base  
646 pairs due to the primers being used, which add to the product length[50]. Regardless there should  
647 still be a linear relationship between the two classifications if HipSTR is predicting genotypes well.

## 648 **Characterization of within-host diversity**

649 We applied the  $F_{ws}$  metric to the *P. vivax* dataset to determine samples that had multiple  
650 infections[30]. Samples with  $F_{ws} < 0.95$  were considered multiple infections[31].  $F_{ws}$  was  
651 calculated using the moimix (Version 0.0.2.9001)[64] R package. Samples with multiple infections  
652 were excluded from further analysis.

## 653 **Multivariable logistic regression modeling for measurement and prediction of the quality** 654 **of STRs**

655 Although *in-silico* STR genotyping methods have QC metrics that can be used to identify well  
656 performing STRs, these have been shown to retain many poorly performing STRs, which are not  
657 easy to identify. In order to collate a set of high-quality STRs, we developed a complex filtering  
658 strategy based on leveraging genetic distance between samples as determined by SNPs and STRs,  
659 aiming to identify further, more precise STR relevant metrics that could be applied to identify high  
660 quality STRs. The rationale here is that variants with high genotyping accuracy should more  
661 accurately represent the population structure of field samples. Based on this, we developed a SNP  
662 PCA based approach to capture the signal STRs. PCA was first performed to investigate potential  
663 population structure using the SNP genotype data (*P. falciparum*: 213,757 SNPs loci; *P. vivax*:  
664 188,571 SNPs loci). The top ten principal components were chosen. The squared Spearman's  
665 correlation coefficient ( $R^2$ ) was then used to assess correlations between the top ten SNP PCs  
666 values and each STR by using the repeat units (number of times the motif is repeated in tandem)  
667 for each sample, using only those STRs retained after the initial QC step described above (*P.*  
668 *falciparum*: 20,196 STRs; *P. vivax*: 23,146 STRs). STRs that correlated with an  $R^2$  above a  
669 permutation derived threshold with any one of the ten significant SNP PCs were deemed to be

670 high quality STRs. The optimal cut-point of the correlation to distinguish high-quality or low-  
671 quality STRs was determined using the resampling permutation test where the population labels  
672 were permuted between samples to derive a null distribution to determine an appropriate  
673 correlation threshold that maximised the difference between high and low quality STRs. This was  
674 determined using the ROC AUC.

675 A set of metrics including QC metrics from HipSTR and metrics that were deemed useful were  
676 derived and used for the prediction of the STR quality. These are summarised in S1 Table. The Z-  
677 score standardization method was used to normalize these metrics. Considering the large  
678 difference of sample size between the *P. falciparum* and *P. vivax* dataset, when calculating the  
679 metrics that are associated with population structure, the *P. falciparum* dataset is based on 8  
680 population-level labels and the *P. vivax* dataset is based on 11 country-level labels. A multivariable  
681 logistic regression analysis was then performed to identify potential predictors of STR quality.  
682 Empirical clustering and subsequent labelling was performed by using SNP genotype data to  
683 calculate the identity-by-state (IBS) pairwise distance between samples using the SNPRelate  
684 (Version 1.20.1)[65] R package. Clustering analysis was then performed to assign the samples  
685 clusters which were assumed to represent geographical regions.

686 Model selection in the multivariable regression models was employed for stepwise regression  
687 analysis based on the Akaike information criterion (AIC) using the R package MASS (Version  
688 7.3-51.5). The effectiveness of the prediction was evaluated by calculating the AUC on the ROC  
689 curve. To assess the predictive performance of the logistic regression model, the large *P.*  
690 *falciparum* dataset was randomly separated into five combinations of training and test sets in an  
691 80/20 split, and fivefold cross-validation was performed. Predictive performance was measured

692 with the AUC in the testing model. To assess the robustness of the performance of the model with  
693 respect to different size datasets, the large *P. falciparum* dataset was also randomly separated into  
694 five combinations of training and test sets of each 70/20, 60/20, 50/20, 40/20, 30/20, 20/20, and  
695 10/20 splits, and fivefold cross-validation was performed. To select the optimal cut-off value to  
696 remove low-quality STRs, the predicted probabilities are sorted into five bins ([0, 0.2), [0.2, 0.4),  
697 [0.4, 0.6), [0.6, 0.8), [0.8, 1]). For each bin we randomly selected 500 STRs and calculated the  
698 correlation of sample pairwise distances of STR and SNP based on PCA analysis, and repeated  
699 this 100 times to calculate the mean value of correlation.

700 The R script used to perform the multivariable logistic regression modeling for measurement and  
701 prediction of the quality of STRs is available on <https://github.com/bahlolab/PlasmoSTR>.

## 702 **Population structure analysis**

703 To investigate the major geographical division of population structure that could be determined  
704 with the final set of STR markers, the SNP-based and STR-based PCA of all 3,047 *P. falciparum*  
705 and 174 *P. vivax* samples were performed separately. In the SNP-based PCA we used 213,757  
706 SNPs for *P. falciparum* and 188,571 SNPs for *P. vivax*. In the STR-based PCA, we used 6,768  
707 (2,563 mononucleotide STR and 4,205 polynucleotide STR) high-quality loci for *P. falciparum*  
708 and 3,496 (1,648 mononucleotide STR and 1,848 polynucleotide STR) for *P. vivax* selected by the  
709 logistic regression model based on predicted probabilities. PCA plots were constructed from the  
710 analysis. UMAP[66] was performed after selecting the significant PCs using the umap (Version  
711 0.2.4.1) R package. SNP and high-quality STR loci across the whole genome were used to  
712 calculate the average IBS distances as the average genetic dissimilarity between pairs of  
713 individuals. The R package SNPRelate[65] was used to calculate the IBS values for SNP data and

714 a method based on Bruvo's distance[67] was used for STR data, providing a stepwise mutation  
715 model appropriate for microsatellite markers. Neighbour-joining trees were then produced using  
716 the R package ape (Version 5.4-1)[68] and ggtree (Version 2.0.4)[69].

### 717 **Genome-wide genetic differentiation**

718 Pairwise estimates of genetic differentiation ( $F_{ST}$ ) between all pairs of populations and countries  
719 defined by geographic origin were calculated using the R package SNPRelate[65] for SNP data  
720 and the R package hierfstat (Version 0.5-7)[70] for microsatellites based on the method of Weir  
721 and Cockerham (1984)[71]. The degree of population differentiation was also measured by  
722 calculating *Jost's D* using the R package mmod (Version 1.3.3)[72], which is a superior diversity  
723 measure for highly polymorphic loci proposed by Jost[73]. The geographic distance between  
724 different populations and countries (km), were calculated using the R packages sf, maps, units,  
725 and rnatuarearth. The Mantel test was performed by the R packages vegan (Version 2.5-7)[74] to  
726 study the correlations between pairwise values of genetic distance and geographical distance  
727 between populations and countries, and also used to check the correlation between pairwise  
728 differentiation measures (*Jost's D* and  $F_{ST}$ ) from SNPs and STRs data.

### 729 **Selection signatures related to geographic differentiation**

730 Global *Jost's D* were calculated per STR for each pairwise population combination (*P. falciparum*:  
731 8 populations = 28 comparisons) and country combination (*P. falciparum*: 26 countries = 325  
732 combinations) using the mmod[72] R package. For *P. vivax*, we only compared the countries with  
733 sample sizes larger than 10 (*P. vivax*: 5 countries = 10 combinations) as many countries had few  
734 samples (< 5). To identify regions with strong signatures of selection, the top 0.1% *Jost's D* values

735 were used to set the threshold to represent a selection signature. Genome-wide distribution of  
736 selection signatures was visualized by plotting the *Jost's D* against chromosome positions. To  
737 determine if a small number of highly differentiated STRs, such as those routinely used in capillary  
738 genotyping based STR analysis, could possibly show the population structure, we extracted the  
739 top ten most highly differentiated STRs from each pairwise comparison. The highly differentiated  
740 multilocus genotypes (MLGs) from these ten STRs were then used to construct a minimum  
741 spanning network (MSN) plot using Bruvo's distance using the R package poppr (Version  
742 2.9.0)[75].

### 743 **Selection signatures related to drug resistance**

744 Based on published genetic markers, all *P. falciparum* samples are classified into different types  
745 of drug resistance in the MalariaGEN *Plasmodium falciparum* Community Project[27]. *Jost's D*  
746 was calculated per STR among the drug-resistant and drug-sensitive samples using the mmod[72]  
747 R package to explore the genetic differentiation. The top 0.1% *Jost's D* values were used to set the  
748 threshold to represent a selection signature. Considering that the malaria parasite population  
749 genetic structure varies substantially among the different populations due to different malaria  
750 control efforts, signatures of selection related to drug resistance were only performed for the  
751 comparison within subpopulations.

## 752 **Acknowledgments**

753 This publication uses data generated by the MalariaGEN *Plasmodium falciparum* Community  
754 Project (<https://www.malariagen.net/resource/26>)[27] and *Plasmodium vivax* Genome Variation



755 project (<https://www.malariagen.net/projects/p-vivax-genome-variation>) as described in Pearson  
756 et al.[29] and *P. vivax* data from Hupalo et al.[28]. We thank the MalariaGEN Consortium and  
757 Hupalo et al.[28] for allowing the use of this data. This work was made possible through the  
758 Victorian State Government Operational Infrastructure Support and Australian Government  
759 National Health and Medical Research Council (NHMRC) Independent Research Institute  
760 Infrastructure Support Scheme (IRIISS). JH was supported by a Melbourne Research Scholarship  
761 (The University of Melbourne) and a WEHI PhD Scholarship. MB was supported by an NHMRC  
762 Senior Research Fellowship (1102971).

## 763 References

- 764 1. Willems T, Zielinski D, Yuan J, Gordon A, Gymrek M, Erlich Y. Genome-wide profiling  
765 of heritable and de novo STR variations. *Nature Methods*. 2017;14(6):590.
- 766 2. Gardner MJ, Hall N, Fung E, White O, Berriman M, Hyman RW, et al. Genome  
767 sequence of the human malaria parasite *Plasmodium falciparum*. *Nature*. 2002;419(6906):498-  
768 511.
- 769 3. Zilversmit MM, Volkman SK, DePristo MA, Wirth DF, Awadalla P, Hartl DL. Low-  
770 Complexity Regions in *Plasmodium falciparum*: Missing Links in the Evolution of an Extreme  
771 Genome. *Molecular Biology and Evolution*. 2010;27(9):2198-209.
- 772 4. McDew-White M, Li X, Nkhoma SC, Nair S, Cheeseman I, Anderson TJC. Mode and  
773 Tempo of Microsatellite Length Change in a Malaria Parasite Mutation Accumulation  
774 Experiment. *Genome Biol Evol*. 2019;11(7):1971-85.
- 775 5. Carlton J. The *Plasmodium vivax* genome sequencing project. *Trends in Parasitology*.  
776 2003;19(5):227-31.
- 777 6. Carlton JM, Adams JH, Silva JC, Bidwell SL, Lorenzi H, Caler E, et al. Comparative  
778 genomics of the neglected human malaria parasite *Plasmodium vivax*. *Nature*.  
779 2008;455(7214):757-63.
- 780 7. Lander ES, Linton LM, Birren B, Nusbaum C, Zody MC, Baldwin J, et al. Initial  
781 sequencing and analysis of the human genome. *Nature*. 2001;409(6822):860-921.
- 782 8. Subramanian S, Kumar S. Neutral substitutions occur at a faster rate in exons than in  
783 noncoding DNA in primate genomes. *Genome Res*. 2003;13(5):838-44.
- 784 9. Battistuzzi FU, Schneider KA, Spencer MK, Fisher D, Chaudhry S, Escalante AA.  
785 Profiles of low complexity regions in Apicomplexa. *BMC Evol Biol*. 2016;16:47-.
- 786 10. Davies HM, Nofal SD, McLaughlin EJ, Osborne AR. Repetitive sequences in malaria  
787 parasite proteins. *FEMS Microbiol Rev*. 2017;41(6):923-40.

- 788 11. Tan JC, Tan A, Checkley L, Honsa CM, Ferdig MT. Variable numbers of tandem repeats  
789 in *Plasmodium falciparum* genes. *J Mol Evol.* 2010;71(4):268-78.
- 790 12. Eklund EH, Fidock DA. Advances in understanding the genetic basis of antimalarial drug  
791 resistance. *Curr Opin Microbiol.* 2007;10(4):363-70.
- 792 13. Andriantsoanirina V, Khim N, Ratsimbaoa A, Witkowski B, Benedet C, Canier L, et al.  
793 *Plasmodium falciparum* Na<sup>+</sup>/H<sup>+</sup> exchanger (pfnhe-1) genetic polymorphism in Indian Ocean  
794 malaria-endemic areas. *The American journal of tropical medicine and hygiene.* 2013;88(1):37-  
795 42.
- 796 14. Anderson TJC, Haubold B, Williams JT, Estrada-Franco JG, Richardson L, Mollinedo  
797 R, et al. Microsatellite Markers Reveal a Spectrum of Population Structures in the Malaria  
798 Parasite *Plasmodium falciparum*. *Molecular Biology and Evolution.* 2000;17(10):1467-82.
- 799 15. Schultz L, Wapling J, Mueller I, Ntsuke PO, Senn N, Nale J, et al. Multilocus haplotypes  
800 reveal variable levels of diversity and population structure of *Plasmodium falciparum* in Papua  
801 New Guinea, a region of intense perennial transmission. *Malaria Journal.* 2010;9(1):336.
- 802 16. Figan CE, Sá JM, Mu J, Melendez-Muniz VA, Liu CH, Wellems TE. A set of  
803 microsatellite markers to differentiate *Plasmodium falciparum* progeny of four genetic crosses.  
804 *Malaria Journal.* 2018;17(1):60.
- 805 17. Manrique P, Miranda-Alban J, Alarcon-Baldeon J, Ramirez R, Carrasco-Escobar G,  
806 Herrera H, et al. Microsatellite analysis reveals connectivity among geographically distant  
807 transmission zones of *Plasmodium vivax* in the Peruvian Amazon: A critical barrier to regional  
808 malaria elimination. *PLOS Neglected Tropical Diseases.* 2019;13(11):e0007876.
- 809 18. Karkar S, Alfonse LE, Grgicak CM, Lun DS. Statistical modeling of STR capillary  
810 electrophoresis signal. *BMC Bioinformatics.* 2019;20(16):584.
- 811 19. Willems T, Gymrek M, Highnam G, Mittelman D, Erlich Y. The landscape of human  
812 STR variation. *Genome Res.* 2014;24(11):1894-904.
- 813 20. Miles A, Iqbal Z, Vauterin P, Pearson R, Campino S, Theron M, et al. Indels, structural  
814 variation, and recombination drive genomic diversity in *Plasmodium falciparum*. *Genome Res.*  
815 2016;26(9):1288-99.
- 816 21. Hamilton WL, Claessens A, Otto TD, Kekre M, Fairhurst RM, Rayner JC, et al. Extreme  
817 mutation bias and high AT content in *Plasmodium falciparum*. *Nucleic Acids Res.*  
818 2017;45(4):1889-901.
- 819 22. McKenna A, Hanna M, Banks E, Sivachenko A, Cibulskis K, Kernytsky A, et al. The  
820 Genome Analysis Toolkit: a MapReduce framework for analyzing next-generation DNA  
821 sequencing data. *Genome Res.* 2010;20(9):1297-303.
- 822 23. Gymrek M, Golan D, Rosset S, Erlich Y. lobSTR: A short tandem repeat profiler for  
823 personal genomes. *Genome Res.* 2012;22(6):1154-62.
- 824 24. Highnam G, Franck C, Martin A, Stephens C, Puthige A, Mittelman D. Accurate human  
825 microsatellite genotypes from high-throughput resequencing data using informed error profiles.  
826 *Nucleic Acids Res.* 2013;41(1):e32.
- 827 25. Mousavi N, Shleizer-Burko S, Yanicky R, Gymrek M. Profiling the genome-wide  
828 landscape of tandem repeat expansions. *Nucleic Acids Research.* 2019;47(15):e90-e.
- 829 26. Halman A, Oshlack A. Accuracy of short tandem repeats genotyping tools in whole  
830 exome sequencing data. *bioRxiv.* 2020:2020.02.03.933002.
- 831 27. MalariaGen, Ahoundi A, Ali M, Almagro-Garcia J, Amambua-Ngwa A, Amaratunga C,  
832 et al. An open dataset of *Plasmodium falciparum* genome variation in 7,000 worldwide samples.  
833 *Wellcome Open Res.* 2021;6:42-.

- 834 28. Hupalo DN, Luo Z, Melnikov A, Sutton PL, Rogov P, Escalante A, et al. Population  
835 genomics studies identify signatures of global dispersal and drug resistance in *Plasmodium*  
836 *vivax*. *Nature genetics*. 2016;48(8):953-8.
- 837 29. Pearson RD, Amato R, Auburn S, Miotto O, Almagro-Garcia J, Amaratunga C, et al.  
838 Genomic analysis of local variation and recent evolution in *Plasmodium vivax*. *Nature Genetics*.  
839 2016;48(8):959-64.
- 840 30. Manske M, Miotto O, Campino S, Auburn S, Almagro-Garcia J, Maslen G, et al.  
841 Analysis of *Plasmodium falciparum* diversity in natural infections by deep sequencing. *Nature*.  
842 2012;487(7407):375-9.
- 843 31. Auburn S, Campino S, Miotto O, Djimde AA, Zongo I, Manske M, et al.  
844 Characterization of within-host *Plasmodium falciparum* diversity using next-generation sequence  
845 data. *PLoS One*. 2012;7(2):e32891.
- 846 32. Benson G. Tandem repeats finder: a program to analyze DNA sequences. *Nucleic Acids*  
847 *Research*. 1999;27(2):573-80.
- 848 33. Bolton KA, Ross JP, Grice DM, Bowden NA, Holliday EG, Avery-Kiejda KA, et al.  
849 STaRRRT: a table of short tandem repeats in regulatory regions of the human genome. *BMC*  
850 *Genomics*. 2013;14(1):795.
- 851 34. Gemayel R, Vincens MD, Legendre M, Verstrepen KJ. Variable Tandem Repeats  
852 Accelerate Evolution of Coding and Regulatory Sequences. *Annual Review of Genetics*.  
853 2010;44(1):445-77.
- 854 35. Li Y-C, Korol AB, Fahima T, Nevo E. Microsatellites Within Genes: Structure, Function,  
855 and Evolution. *Molecular Biology and Evolution*. 2004;21(6):991-1007.
- 856 36. Haasl RJ, Payseur BA. Multi-locus inference of population structure: a comparison  
857 between single nucleotide polymorphisms and microsatellites. *Heredity*. 2011;106(1):158-71.
- 858 37. Fischer MC, Rellstab C, Leuzinger M, Roumet M, Gugerli F, Shimizu KK, et al.  
859 Estimating genomic diversity and population differentiation – an empirical comparison of  
860 microsatellite and SNP variation in *Arabidopsis halleri*. *BMC Genomics*. 2017;18(1):69.
- 861 38. Zimmerman SJ, Aldridge CL, Oyler-McCance SJ. An empirical comparison of  
862 population genetic analyses using microsatellite and SNP data for a species of conservation  
863 concern. *BMC Genomics*. 2020;21(1):382.
- 864 39. Volkman SK, Neafsey DE, Schaffner SF, Park DJ, Wirth DF. Harnessing genomics and  
865 genome biology to understand malaria biology. *Nature Reviews Genetics*. 2012;13(5):315-28.
- 866 40. Amambua-Ngwa A, Amenga-Etego L, Kamau E, Amato R, Ghansah A, Golassa L, et al.  
867 Major subpopulations of *Plasmodium falciparum* in sub-Saharan Africa. *Science*.  
868 2019;365(6455):813-6.
- 869 41. Rocamora F, Zhu L, Liong KY, Dondorp A, Miotto O, Mok S, et al. Oxidative stress and  
870 protein damage responses mediate artemisinin resistance in malaria parasites. *PLoS Pathog*.  
871 2018;14(3):e1006930.
- 872 42. Xiong A, Prakash P, Gao X, Chew M, Tay IJJ, Woodrow CJ, et al. K13-Mediated  
873 Reduced Susceptibility to Artemisinin in *Plasmodium falciparum* Is Overlaid on a Trait of  
874 Enhanced DNA Damage Repair. *Cell Rep*. 2020;32(5):107996.
- 875 43. Amambua-Ngwa A, Tetteh KK, Manske M, Gomez-Escobar N, Stewart LB, Deerrhake  
876 ME, et al. Population genomic scan for candidate signatures of balancing selection to guide  
877 antigen characterization in malaria parasites. *PLoS Genet*. 2012;8(11):e1002992.
- 878 44. Hamilton MJ, Lee M, Le Roch KG. The ubiquitin system: an essential component to  
879 unlocking the secrets of malaria parasite biology. *Mol Biosyst*. 2014;10(4):715-23.

- 880 45. Park DJ, Lukens AK, Neafsey DE, Schaffner SF, Chang HH, Valim C, et al. Sequence-  
881 based association and selection scans identify drug resistance loci in the *Plasmodium falciparum*  
882 malaria parasite. *Proc Natl Acad Sci U S A*. 2012;109(32):13052-7.
- 883 46. Sanchez CP, Liu CH, Mayer S, Nurhasanah A, Cyrklaff M, Mu J, et al. A HECT  
884 ubiquitin-protein ligase as a novel candidate gene for altered quinine and quinidine responses in  
885 *Plasmodium falciparum*. *PLoS Genet*. 2014;10(5):e1004382.
- 886 47. Amambua-Ngwa A, Danso B, Worwui A, Ceesay S, Davies N, Jeffries D, et al.  
887 Exceptionally long-range haplotypes in *Plasmodium falciparum* chromosome 6 maintained in an  
888 endemic African population. *Malar J*. 2016;15(1):515.
- 889 48. Henden L, Lee S, Mueller I, Barry A, Bahlo M. Identity-by-descent analyses for  
890 measuring population dynamics and selection in recombining pathogens. *PLOS Genetics*.  
891 2018;14(5):e1007279.
- 892 49. Sawaya SM, Bagshaw AT, Buschiazzo E, Gemmell NJ. Promoter microsatellites as  
893 modulators of human gene expression. *Adv Exp Med Biol*. 2012;769:41-54.
- 894 50. Anderson TJ, Su XZ, Bockarie M, Lagog M, Day KP. Twelve microsatellite markers for  
895 characterization of *Plasmodium falciparum* from finger-prick blood samples. *Parasitology*. 1999;119 ( Pt 2):113-25.
- 897 51. Jakubosky D, Smith EN, D'Antonio M, Jan Bonder M, Young Greenwald WW,  
898 D'Antonio-Chronowska A, et al. Discovery and quality analysis of a comprehensive set of  
899 structural variants and short tandem repeats. *Nature Communications*. 2020;11(1):2928.
- 900 52. Ye R, Tian Y, Huang Y, Zhang Y, Wang J, Sun X, et al. Genome-Wide Analysis of  
901 Genetic Diversity in *Plasmodium falciparum* Isolates From China–Myanmar Border. *Frontiers in*  
902 *Genetics*. 2019;10(1065).
- 903 53. Mobegi VA, Duffy CW, Amambua-Ngwa A, Loua KM, Laman E, Nwakanma DC, et al.  
904 Genome-Wide Analysis of Selection on the Malaria Parasite *Plasmodium falciparum* in West  
905 African Populations of Differing Infection Endemicity. *Molecular Biology and Evolution*.  
906 2014;31(6):1490-9.
- 907 54. Animut A, Lindtjorn B. Use of epidemiological and entomological tools in the control  
908 and elimination of malaria in Ethiopia. *Malar J*. 2018;17(1):26.
- 909 55. Lo E, Hemming-Schroeder E, Yewhalaw D, Nguyen J, Kebede E, Zemene E, et al.  
910 Transmission dynamics of co-endemic *Plasmodium vivax* and *P. falciparum* in Ethiopia and  
911 prevalence of antimalarial resistant genotypes. *PLOS Neglected Tropical Diseases*.  
912 2017;11(7):e0005806.
- 913 56. Degefa T, Zeynudin A, Godesso A, Michael YH, Eba K, Zemene E, et al. Malaria  
914 incidence and assessment of entomological indices among resettled communities in Ethiopia: a  
915 longitudinal study. *Malaria Journal*. 2015;14(1):24.
- 916 57. Lonsdale J, Thomas J, Salvatore M, Phillips R, Lo E, Shad S, et al. The Genotype-Tissue  
917 Expression (GTEx) project. *Nature Genetics*. 2013;45(6):580-5.
- 918 58. Bahl A, Brunk B, Crabtree J, Fraunholz MJ, Gajria B, Grant GR, et al. PlasmoDB: the  
919 *Plasmodium* genome resource. A database integrating experimental and computational data.  
920 *Nucleic Acids Res*. 2003;31(1):212-5.
- 921 59. Brouard J-S, Schenkel F, Marete A, Bissonnette N. The GATK joint genotyping  
922 workflow is appropriate for calling variants in RNA-seq experiments. *Journal of Animal Science*  
923 *and Biotechnology*. 2019;10(1):44.

- 924 60. Cingolani P, Platts A, Wang LL, Coon M, Nguyen T, Wang L, et al. A program for  
925 annotating and predicting the effects of single nucleotide polymorphisms, SnpEff. *Fly*.  
926 2012;6(2):80-92.
- 927 61. Kyes SA, Kraemer SM, Smith JD. Antigenic variation in *Plasmodium falciparum*: gene  
928 organization and regulation of the var multigene family. *Eukaryot Cell*. 2007;6(9):1511-20.
- 929 62. Obenchain V, Lawrence M, Carey V, Gogarten S, Shannon P, Morgan M.  
930 VariantAnnotation: a Bioconductor package for exploration and annotation of genetic variants.  
931 *Bioinformatics*. 2014;30(14):2076-8.
- 932 63. Greenhouse B, Myrick A, Dokomajilar C, Woo JM, Carlson EJ, Rosenthal PJ, et al.  
933 Validation of microsatellite markers for use in genotyping polyclonal *Plasmodium falciparum*  
934 infections. *The American journal of tropical medicine and hygiene*. 2006;75(5):836-42.
- 935 64. Lee S BM. moimix: an R package for assessing clonality in high-throughput sequencing  
936 data. 2016.
- 937 65. Zheng X, Levine D, Shen J, Gogarten SM, Laurie C, Weir BS. A high-performance  
938 computing toolset for relatedness and principal component analysis of SNP data. *Bioinformatics*.  
939 2012;28(24):3326-8.
- 940 66. McInnes L, Healy J, Saul N, Großberger L. UMAP: Uniform Manifold Approximation  
941 and Projection. *Journal of Open Source Software*. 2018;3(29).
- 942 67. Bruvo R, Michiels NK, D'Souza TG, Schulenburg H. A simple method for the calculation  
943 of microsatellite genotype distances irrespective of ploidy level. *Mol Ecol*. 2004;13(7):2101-6.
- 944 68. Paradis E, Claude J, Strimmer K. APE: Analyses of Phylogenetics and Evolution in R  
945 language. *Bioinformatics*. 2004;20(2):289-90.
- 946 69. Yu G. Using ggtree to Visualize Data on Tree-Like Structures. *Curr Protoc*  
947 *Bioinformatics*. 2020;69(1):e96.
- 948 70. GOUDET J. hierfstat, a package for r to compute and test hierarchical F-statistics.  
949 *Molecular Ecology Notes*. 2005;5(1):184-6.
- 950 71. Weir BS, Cockerham CC. Estimating F-Statistics for the Analysis of Population  
951 Structure. *Evolution*. 1984;38(6):1358-70.
- 952 72. Jost L. G(ST) and its relatives do not measure differentiation. *Mol Ecol*.  
953 2008;17(18):4015-26.
- 954 73. Gerlach G, Jueterbock A, Kraemer P, Deppermann J, Harmand P. Calculations of  
955 population differentiation based on GST and D: forget GST but not all of statistics! *Mol Ecol*.  
956 2010;19(18):3845-52.
- 957 74. Dixon P. VEGAN, a package of R functions for community ecology. *Journal of*  
958 *Vegetation Science*. 2003;14(6):927-30.
- 959 75. Kamvar ZN, Tabima JF, Grünwald NJ. Poppr: an R package for genetic analysis of  
960 populations with clonal, partially clonal, and/or sexual reproduction. *PeerJ*. 2014;2:e281.

961

## 962 **Supporting information**

963 **S1 Fig. Comparison with *P. falciparum* gel electrophoresis data.** Bubble plots representing the GE allele calls are  
964 plotted against HipSTR's calls, where the left plot has been shifted such that the bottom leftmost point lies on the  
965 origin. In plot (b) points are coloured according to the region where samples originated from. The line represents  $y =$   
966  $x$ . It is important to note that in most of these plots, the Milne Bay samples are typically off the line  $y = x$ , indicating  
967 potential underlying issues with the GE calls for Milne Bay samples.

968 **S2 Fig. ROC curves and AUC values of the *P. falciparum* complete dataset and five train datasets.** (A) The  
969 mononucleotide STR model. (B) The polynucleotide STR model.

970 **S3 Fig. AUC values of the *P. falciparum* fivefold cross validation-datasets (80/20, 70/20, 60/20, 50/20, 40/20,  
971 30/20, 20/20, and 10/20 splits).** (A) The mononucleotide STR model. (B) The polynucleotide STR model.

972 **S4 Fig. Principal component analysis of the 3,047 *P. falciparum* samples of SNP and STR data.** (A) SNP-based  
973 PCA based on 213,757 loci. (B) STR-based PCA based on 6,768 (2,563 mononucleotide STR and 4,205  
974 polynucleotide STR) high-quality loci.

975 **S5 Fig. Principal component analysis of the 174 *P. vivax* samples of SNP and STR data.** (A) SNP-based PCA  
976 based on 188,571 loci. (B) STR-based PCA based on 3,496 (1,648 mononucleotide STR and 1,848 polynucleotide  
977 STR) high-quality loci.

978 **S6 Fig. Population structure analysis of the 174 *P. vivax* samples of SNP and STR data.** (A) UMAP clustering of  
979 the top five principal components of the SNP data. (B) UMAP clustering of the top five principal components of the  
980 STR data with different colours representing the eight different countries. (C) NJTs based on the SNP data. (D) NJTs  
981 based on the STR data. Branches are colored according to the country.

982 **S7 Fig. Sub-population structure analysis of the SAM and EAF population *P. falciparum* samples of SNP and  
983 STR data.** (A) UMAP on the top five principal components of the SNP data (SAM countries). (B) UMAP on the top  
984 five principal components of the STR data (SAM countries). Colouring the points by the SAM countries. (C) UMAP  
985 on the top five principal components of the SNP data (EAF countries). (D) UMAP on the top five principal components  
986 of the STR data (EAF countries). Colouring the points by the EAF countries.

987 **S8 Fig. A comparison of measures of genetic differentiation (*Jost's D* and  $F_{ST}$ ) estimates using SNP and STR**  
988 **data of *P. falciparum*.** (A) *Jost's D* of population pairs (*Mantel*  $r = 0.996$ ,  $P = 0.001$ ). (B) *Jost's D* of country pairs  
989 (*Mantel*  $r = 0.996$ ,  $P = 0.001$ ). (C)  $F_{ST}$  of population pairs (*Mantel*  $r = 0.97$ ,  $P = 0.001$ ). (D)  $F_{ST}$  of country pairs  
990 (*Mantel*  $r = 0.90$ ,  $P = 0.001$ ). Mantel tests were used to measure the correlation.

991 **S9 Fig. A comparison of measures of genetic differentiation (*Jost's D* and  $F_{ST}$ ) estimates using SNP and STR**  
992 **data of *P. vivax*.** (A) *Jost's D* of country pairs (*Mantel*  $r = 0.9678$ ,  $P = 0.001$ ). (B)  $F_{ST}$  of country pairs (*Mantel*  $r =$   
993  $0.9185$ ,  $P = 0.001$ ). Mantel tests were used to measure the correlation.

994 **S10 Fig. Pairwise genetic distance (*Jost's D*) and geographical distances (km) between populations and**  
995 **countries of *P. falciparum*.** (A) SNP data of populations. (B) STR data of populations. (C) SNP data of countries. (D)  
996 SNP data of countries. A Mantel test was used to measure the association.

997 **S11 Fig. Pairwise genetic distance (*Jost's D* and  $F_{ST}$ ) and geographical distances (km) between countries of *P.***  
998 ***vivax*.** (A) SNP data of country pairs (*Jost's D*). (B) STR data of country pairs (*Jost's D*). (C) SNP data of country  
999 pairs ( $F_{ST}$ ). (D) SNP data of country pairs ( $F_{ST}$ ). A Mantel test was used to measure the association.

1000 **S12 Fig. Minimum spanning network using Bruvo's distances based on the ten most informative STR markers**  
1001 **showing the relationship among two groups of *P. vivax* isolates.** (A) Cambodia and Thailand. (B) Colombia and  
1002 Peru. (C) Mexico and Peru. Colors correspond to the country. Node sizes correspond to the number of samples. Edge  
1003 lengths are arbitrary.

1004 **S13 Fig. Examples of corresponding genotypes.** (A) One drug-resistant sample. (B) One drug-sensitive sample.

1005 **S1 Table. Baseline variables used for prediction of the STR quality.**

1006 **S2 Table. Multivariable logistic regression model's estimated coefficients and respective 95% confidence**  
1007 **intervals.** The model was fitted on the *P. falciparum* dataset without the population origin label.

1008 **S3 Table. Multivariable logistic regression model's estimated coefficients and respective 95% confidence**  
1009 **intervals.** The model was fitted on the *P. vivax* dataset.

1010 **S4 Table. Multivariable logistic regression model's estimated coefficients and respective 95% confidence**  
1011 **intervals.** The model was fitted on the *P. vivax* dataset without the population origin label.

1012 **S5 Table. Detected selection signatures (located in the coding region) between the *P. falciparum* populations**  
1013 **containing the top 0.1% of STR.**

1014 **S6 Table. Detected selection signatures (located in the coding region) between the *P. vivax* countries containing**  
1015 **the top 0.1% of STR.**

1016 **S7 Table. *P. falciparum* STR markers used in the analysis and the number of samples genotyped at each STR**  
1017 **marker.** The symbol “\*” denotes markers which were dropped in the TRF post-processing phase rather than the  
1018 HipSTR phase. The table also highlights the location of the markers on the Pf3D7 reference genome as determined  
1019 by the BLAST search.

## 1020 **Author Contributions**

1021 Conceptualization: Melanie Bahlo.

1022 Data curation: Jiru Han, Jacob E. Munro.

1023 Formal analysis: Jiru Han.

1024 Funding acquisition: Melanie Bahlo.

1025 Investigation: Jiru Han, Jacob E. Munro, Anthony Kocoski, Alyssa Barry, Melanie Bahlo.

1026 Methodology: Jiru Han, Jacob E. Munro, Melanie Bahlo.

1027 Project administration: Melanie Bahlo.

1028 Resources: Alyssa Barry, Melanie Bahlo.



1029 Supervision: Melanie Bahlo.

1030 Validation: Jiru Han.

1031 Visualization: Jiru Han.

1032 Writing – original draft: Jiru Han

1033 Writing – review & editing: Jiru Han, Jacob E. Munro, Anthony Kocoski, Alyssa Barry, Melanie

1034 Bahlo.

1035
